# Supplementary material
Source: PubMed Central journal article supplement (PMC7553089)
Supplement: sj-pdf-1-ebm-10.1177_1535370220945987.pdf [file sj-pdf-1-ebm-10.1177_1535370220945987.pdf]

Table S1 Clinical and pathological characteristics of patients

| No   | age (year) | gender | histologic type            | smoking history | drinking history | The scope of primary tumor | Lymph node metastasis | Distant metastasis | TNM Stage |
|------|------------|--------|----------------------------|-----------------|------------------|----------------------------|-----------------------|--------------------|-----------|
| P001 | 67         | male   | lung cancer                | Y               | Y                | T1                         | N0                    | M0                 | Ia        |
| P002 | 49         | female | lung adenocarcinoma        | N               | N                | T4                         | N2                    | M1c                | IVc       |
| P003 | 75         | female | lung adenocarcinoma        | N               | N                | T4                         | N3                    | M1c                | IVc       |
| P004 | 60         | male   | squamous cell carcinoma    | Y               | Y                | T2b                        | N1                    | M0                 | IIB       |
| P005 | 57         | female | lung adenocarcinoma        | N               | N                | T1                         | N0                    | M0                 | Ia        |
| P006 | 63         | male   | squamous cell carcinoma    | N               | N                | T1                         | N0                    | M0                 | Ia        |
| P007 | 62         | male   | squamous cell carcinoma    | Y               | Y                | T2b                        | N0                    | M0                 | IIa       |
| P008 | 65         | female | lung adenocarcinoma        | N               | N                | T1b                        | N0                    | M0                 | Ia2       |
| P009 | 55         | male   | lung adenocarcinoma        | Y               | Y                | T4                         | N3                    | M1                 | IV        |
| P010 | 60         | male   | lung cancer                | Y               | Y                | T1c                        | N2                    | M1c                | IVb       |
| P011 | 75         | female | Adenosquamous carcinom     | N               | N                | Tx                         | N2                    | M1c                | IVb       |
| P012 | 59         | male   | squamous cell carcinoma    | Y               | N                | T4                         | N0                    | M1a                | IVa       |
| P013 | 55         | female | lung adenocarcinoma        | N               | N                | Ais                        | N0                    | M0                 | 0         |
| P014 | 60         | male   | squamous cell carcinoma    | Y               | Y                | Scis                       | N0                    | M0                 | 0         |
| P015 | 67         | female | lung adenocarcinoma        | N               | N                | T2                         | N0                    | M0                 | Ib        |
| P016 | 52         | female | lung adenocarcinoma        | N               | N                | T4                         | N3                    | M1c                | IVb       |
| P017 | 64         | female | lung adenocarcinoma        | N               | N                | T1b                        | N0                    | M0                 | Ia2       |
| P018 | 61         | male   | squamous cell carcinoma    | Y               | N                | T2b                        | N2                    | M0                 | IIIa      |
| P019 | 73         | male   | Non small cell lung cancer | Y               | Y                | T1                         | N0                    | M0                 | Ia        |
| P020 | 57         | female | lung adenocarcinoma        | N               | N                | T3                         | N2                    | M1                 | IV        |
| P021 | 80         | male   | lung adenocarcinoma        | N               | N                | T4                         | N3                    | M1c                | IVb       |
| P022 | 57         | male   | lung adenocarcinoma        | N               | Y                | T1                         | N0                    | M0                 | Ia        |
| P023 | 61         | male   | lung adenocarcinoma        | Y               | Y                | T1b                        | N3                    | M1c                | IVb       |
| P024 | 63         | male   | squamous cell carcinoma    | Y               | Y                | T3                         | N0                    | M0                 | IIB       |
| P025 | 72         | female | lung adenocarcinoma        | N               | N                | T1b                        | N0                    | M0                 | Ia        |
| P026 | 77         | male   | lung adenocarcinoma        | Y               | N                | unknown                    | unknown               | unknown            | IV        |
| P027 | 71         | female | lung adenocarcinoma        | N               | N                | T1                         | N0                    | M0                 | Ia        |
| P028 | 59         | male   | lung adenocarcinoma        | Y               | N                | T3                         | N2                    | M1                 | IV        |
| P029 | 56         | male   | lung adenocarcinoma        | Y               | Y                | T2                         | N3                    | M0                 | IIIb      |
| P030 | 54         | male   | squamous cell carcinoma    | Y               | N                | T4                         | N2                    | M1b                | IVa       |
| P031 | 51         | female | lung adenocarcinoma        | N               | N                | T1                         | N0                    | M0                 | Ia        |
| P032 | 74         | male   | lung adenocarcinoma        | Y               | N                | T3                         | N2                    | M1                 | IV        |
| P033 | 60         | female | lung adenocarcinoma        | N               | N                | T1b                        | N0                    | M0                 | Ia2       |
| P034 | 65         | female | lung adenocarcinoma        | N               | N                | T2b                        | N2                    | M0                 | IIIa      |
| P035 | 60         | male   | squamous cell carcinoma    | Y               | N                | Tx                         | N2                    | M1                 | IVb       |
| P036 | 55         | female | lung adenocarcinoma        | N               | N                | Ais                        | N0                    | M0                 | 0         |
| P037 | 61         | male   | lung adenocarcinoma        | Y               | Y                | T2                         | N0                    | M1c                | IVb       |
| P038 | 54         | female | lung adenocarcinoma        | N               | N                | T1b                        | N0                    | M0                 | Ia2       |
| P039 | 69         | female | lung adenocarcinoma        | N               | N                | T1b                        | N2                    | M1a                | IVa       |
| P040 | 65         | male   | lung cancer                | Y               | N                | T4                         | N3                    | M1                 | IV        |
| P041 | 70         | female | squamous cell carcinoma    | N               | N                | T2                         | N2                    | M0                 | IIIa      |
| P042 | 66         | female | lung adenocarcinoma        | N               | N                | T2                         | N0                    | M1                 | IV        |
| P043 | 66         | female | lung adenocarcinoma        | N               | N                | T4                         | N3                    | M1                 | IV        |
| P044 | 70         | female | lung adenocarcinoma        | N               | N                | T1                         | N0                    | M0                 | Ia        |
| P045 | 69         | male   | lung adenocarcinoma        | Y               | N                | T2b                        | N0                    | M1c                | IVb       |
| P046 | 63         | male   | lung adenocarcinoma        | N               | N                | T2                         | N0                    | M1                 | IV        |
| P047 | 50         | male   | lung adenocarcinoma        | Y               | Y                | T3                         | N3                    | M1c                | IVb       |
| P048 | 69         | male   | lung adenocarcinoma        | Y               | Y                | T4                         | N3                    | M1                 | IV        |
| P049 | 63         | male   | lung adenocarcinoma        | Y               | Y                | T1c                        | N0                    | M0                 | Ia3       |
| P050 | 55         | female | lung adenocarcinoma        | N               | N                | T2                         | N2                    | M1                 | IV        |
| P051 | 60         | male   | squamous cell carcinoma    | Y               | N                | T2b                        | N2                    | M0                 | IIIa      |
| P052 | 56         | male   | lung adenocarcinoma        | Y               | Y                | unknown                    | unknown               | unknown            | IV        |
| P053 | 71         | female | lung adenocarcinoma        | N               | N                | T4                         | N3                    | M1b                | IVb       |

|      |    |        |                           |   |   |         |         |         |      |
|------|----|--------|---------------------------|---|---|---------|---------|---------|------|
| P054 | 71 | male   | lung cancer               | Y | Y | Tis     | N0      | M0      | 0    |
| P055 | 57 | female | lung adenocarcinoma       | N | N | T2      | N0      | M0      | IIa  |
| P056 | 51 | male   | lung adenocarcinoma       | Y | N | T2      | N3      | M1c     | IVb  |
| P057 | 73 | male   | squamous cell carcinoma   | Y | N | T2      | N3      | M1      | IV   |
| P058 | 66 | male   | squamous cell carcinoma   | Y | Y | T4      | N1      | M0      | IIIa |
| P059 | 70 | male   | squamous cell carcinoma   | Y | N | T3      | N1      | M0      | IIIa |
| P060 | 66 | male   | lung adenocarcinoma       | Y | N | T4      | N2      | M0      | IIIb |
| P061 | 67 | male   | lung adenocarcinoma       | N | N | T2a     | N2      | M0      | IIIa |
| P062 | 57 | female | lung adenocarcinoma       | N | N | T2      | N0      | M0      | Ib   |
| P063 | 54 | female | lung adenocarcinoma       | N | N | T1      | N0      | M0      | Ia   |
| P064 | 61 | female | lung adenocarcinoma       | N | N | T4      | N0      | M1a     | Ia   |
| P065 | 62 | female | lung adenocarcinoma       | N | N | T4      | N3      | M1b     | IVb  |
| P066 | 67 | female | lung adenocarcinoma       | N | N | T3      | N3      | M1      | IV   |
| P067 | 60 | female | lung adenocarcinoma       | N | N | T3      | N2      | M1      | IV   |
| P068 | 66 | female | lung adenocarcinoma       | N | N | T3      | N2      | M1c     | IVb  |
| P069 | 68 | male   | lung adenocarcinoma       | Y | N | Tx      | N2      | M1      | IV   |
| P070 | 53 | male   | squamous cell carcinoma   | Y | N | T4      | N2      | M0      | IIIb |
| P071 | 61 | female | lung adenocarcinoma       | N | N | T1      | N2      | M0      | IIIa |
| P072 | 72 | male   | lung adenocarcinoma       | N | Y | T4      | N2      | M1      | IV   |
| P073 | 44 | male   | lung adenocarcinoma       | Y | Y | T3      | N2      | M1b     | IVa  |
| P074 | 72 | male   | squamous cell carcinoma   | Y | Y | T2      | N1      | M0      | IIB  |
| P075 | 64 | male   | lung adenocarcinoma       | Y | N | T2b     | N3      | M1c     | IVb  |
| P076 | 52 | male   | squamous cell carcinoma   | Y | Y | T2      | N1      | M0      | IIa  |
| P077 | 77 | male   | squamous cell carcinoma   | Y | N | T2      | N0      | M0      | IIa  |
| P078 | 76 | male   | lung adenocarcinoma       | Y | Y | T4      | N2      | M1      | IV   |
| P079 | 71 | female | lung adenocarcinoma       | N | N | T1b     | N0      | M0      | Ia2  |
| P080 | 51 | male   | lung adenocarcinoma       | Y | N | T1b     | N3      | M1      | IVb  |
| P081 | 47 | female | lung adenocarcinoma       | N | N | Ais     | N0      | M0      | 0    |
| P082 | 57 | male   | squamous cell carcinoma   | Y | Y | T4      | N2      | M0      | IIIb |
| P083 | 56 | male   | lung adenocarcinoma       | N | N | unknown | unknown | unknown | IV   |
| P084 | 49 | female | lung adenocarcinoma       | N | N | T2      | N3      | M1      | IV   |
| P085 | 62 | female | lung adenocarcinoma       | N | N | T1c     | N3      | M1c     | IVb  |
| P086 | 69 | male   | Non small cell lung cance | N | N | T2      | N3      | M0      | IIIb |
| P087 | 62 | male   | lung adenocarcinoma       | Y | Y | T2      | N2      | M1a     | IVa  |
| P088 | 74 | female | lung adenocarcinoma       | N | N | T3      | N0      | M0      | IIB  |
| P089 | 55 | female | lung adenocarcinoma       | N | N | T1      | N0      | M1      | IVa  |
| P090 | 64 | male   | squamous cell carcinoma   | Y | Y | T4      | N1      | M0      | IIIa |
| P091 | 63 | male   | lung adenocarcinoma       | Y | N | T4      | N2      | M1a     | IVa  |
| P092 | 56 | male   | squamous cell carcinoma   | Y | Y | T4      | N0      | M0      | IIIa |
| P093 | 64 | female | lung adenocarcinoma       | N | N | T4      | N2      | M1c     | IVb  |
| P094 | 61 | male   | lung adenocarcinoma       | Y | Y | T2      | N2      | M1      | IV   |
| P095 | 57 | female | lung adenocarcinoma       | N | N | T2      | N2      | M1c     | IVb  |
| P096 | 65 | female | lung adenocarcinoma       | N | N | T2      | N1      | M0      | IIa  |
| P097 | 64 | male   | squamous cell carcinoma   | Y | Y | T2      | N2      | M0      | IIIa |
| P098 | 74 | male   | squamous cell carcinoma   | Y | Y | T2      | N2      | M0      | IIIa |
| P099 | 34 | female | lung adenocarcinoma       | N | N | T4      | N3      | M1      | IV   |
| P100 | 44 | male   | lung adenocarcinoma       | Y | Y | T4      | N2      | M0      | IIIb |
| P101 | 58 | female | lung adenocarcinoma       | Y | Y | T4      | N2      | M1a     | IVa  |
| P102 | 82 | male   | lung adenocarcinoma       | Y | N | T2      | N2      | M1      | IV   |
| P103 | 70 | male   | lung adenocarcinoma       | Y | N | T4      | N2      | M0      | IIIb |
| P104 | 61 | male   | lung adenocarcinoma       | N | N | T4      | N3      | M1b     | IVb  |
| P105 | 59 | female | lung adenocarcinoma       | N | N | T2      | N3      | M1      | IVb  |
| P106 | 60 | male   | lung adenocarcinoma       | Y | Y | T4      | N3      | M1a     | IVa  |
| P107 | 68 | male   | Non small cell lung cance | Y | Y | T4      | NX      | M1      | IV   |
| P108 | 70 | male   | lung adenocarcinoma       | Y | Y | T2      | N2      | M0      | IIIa |
| P109 | 63 | female | lung adenocarcinoma       | N | N | T1      | N2      | M0      | IIIa |
| P110 | 79 | male   | lung adenocarcinoma       | Y | N | Ais     | N0      | M0      | 0    |
| P111 | 54 | male   | squamous cell carcinoma   | Y | Y | T2a     | N2      | M0      | IIIa |
| P112 | 71 | male   | lung adenocarcinoma       | Y | Y | T4      | N3      | M1      | IV   |

|      |    |        |                           |   |   |         |         |         |         |
|------|----|--------|---------------------------|---|---|---------|---------|---------|---------|
| P113 | 59 | male   | squamous cell carcinoma   | Y | Y | T4      | N0      | M1      | IV      |
| P114 | 64 | female | lung adenocarcinoma       | N | N | T1      | N3      | M0      | IIIb    |
| P115 | 48 | female | lung adenocarcinoma       | N | N | T3      | N2      | M1c     | IVb     |
| P116 | 58 | female | squamous cell carcinoma   | N | N | T4      | N0      | M0      | IIIa    |
| P117 | 61 | female | lung adenocarcinoma       | N | N | T1      | N0      | M0      | Ia      |
| P118 | 72 | female | lung adenocarcinoma       | N | N | T2      | N0      | M0      | Ib      |
| P119 | 67 | male   | lung adenocarcinoma       | Y | Y | pT1C    | N0      | M0      | Ia3     |
| P120 | 72 | male   | squamous cell carcinoma   | Y | Y | T1      | N0      | M0      | Ia      |
| P121 | 61 | male   | Adenosquamous carcinom    | Y | Y | T2      | N2      | M1      | IV      |
| P122 | 49 | female | lung adenocarcinoma       | N | N | T1b     | N0      | M0      | Ia2     |
| P123 | 50 | female | lung adenocarcinoma       | N | N | T1a     | N0      | M0      | Ia1     |
| P124 | 46 | male   | lung adenocarcinoma       | Y | Y | Tx      | N3      | M1b     | IVb     |
| P125 | 71 | female | lung adenocarcinoma       | N | N | T2      | N0      | M0      | Ib      |
| P126 | 52 | female | lung adenocarcinoma       | N | N | T1      | N0      | M0      | Ia      |
| P127 | 67 | female | lung adenocarcinoma       | N | N | T2      | N1      | M0      | IIb     |
| P128 | 48 | male   | lung adenocarcinoma       | Y | Y | T1b     | N3      | M0      | IIIb    |
| P129 | 63 | female | lung adenocarcinoma       | N | N | T2b     | N0      | M0      | IIa     |
| P130 | 52 | female | lung adenocarcinoma       | N | N | T1      | N0      | M0      | Ia      |
| P131 | 75 | female | Non small cell lung cance | N | N | T2a     | N0      | M0      | Ib      |
| P132 | 64 | female | lung adenocarcinoma       | N | N | T1b     | N0      | M0      | Ia2     |
| P133 | 81 | male   | squamous cell carcinoma   | Y | N | T1      | N0      | M0      | Ib      |
| P134 | 31 | female | lung adenocarcinoma       | N | N | T1a     | N0      | M0      | Ia1     |
| P135 | 56 | female | lung adenocarcinoma       | N | N | T2      | N0      | M0      | Ib      |
| P136 | 53 | male   | squamous cell carcinoma   | Y | Y | T3      | N3      | M0      | IIIc    |
| P137 | 64 | male   | squamous cell carcinoma   | Y | Y | T2      | N3      | M0      | IIIb    |
| P138 | 73 | female | lung adenocarcinoma       | N | N | T1c     | N0      | M0      | Ia3     |
| P139 | 64 | female | lung adenocarcinoma       | N | N | unknown | unknown | unknown | unknown |
| P140 | 61 | female | lung adenocarcinoma       | N | N | T1      | N0      | M0      | Ia      |
| P141 | 58 | female | lung adenocarcinoma       | N | N | T1      | N0      | M0      | Ia2     |
| P142 | 63 | male   | cell neuroendocrine carci | Y | Y | T1c     | N1      | M0      | IIb     |
| P143 | 51 | male   | lung adenocarcinoma       | N | N | T1b     | N0      | M0      | Ia      |
| P144 | 55 | male   | Mucoepidermoid carcinom   | Y | N | T2      | N1      | M0      | IIb     |
| P145 | 54 | male   | Non small cell lung cance | Y | Y | T2a     | N3      | M0      | IIIb    |
| P146 | 65 | male   | lung adenocarcinoma       | Y | Y | T1      | N0      | M0      | Ia      |
| P147 | 74 | male   | lung adenocarcinoma       | Y | Y | T1      | N0      | M0      | Ia      |
| P148 | 74 | male   | squamous cell carcinoma   | Y | Y | T3      | N3      | M1c     | IVb     |
| P149 | 62 | male   | squamous cell carcinoma   | Y | Y | Scis    | N0      | M0      | 0       |
| P150 | 72 | male   | squamous cell carcinoma   | Y | N | unknown | unknown | unknown | unknown |
| P151 | 71 | female | lung adenocarcinoma       | N | N | T4      | N2      | M1      | IV      |
| P152 | 60 | male   | lung adenocarcinoma       | Y | Y | T2      | N2      | M1c     | IVb     |
| P153 | 53 | male   | squamous cell carcinoma   | Y | N | Tx      | N2      | M1      | IV      |
| P154 | 41 | female | lung adenocarcinoma       | N | N | T4      | N2      | M0      | IIIb    |
| P155 | 76 | male   | squamous cell carcinoma   | Y | N | T1c     | N3      | M1c     | IVb     |
| P156 | 46 | male   | lung adenocarcinoma       | Y | N | T1      | N2      | M0      | IIIa    |
| P157 | 48 | female | lung adenocarcinoma       | N | N | Ais     | N0      | M0      | 0       |
| P158 | 62 | male   | lung adenocarcinoma       | Y | Y | T2      | N2      | M0      | IIIa    |
| P159 | 72 | male   | lung adenocarcinoma       | Y | Y | T4      | N3      | M0      | IIIb    |
| P160 | 76 | male   | lung adenocarcinoma       | N | N | Tx      | N2      | M0      | III     |
| P161 | 52 | male   | lung adenocarcinoma       | Y | N | T1      | N3      | M1c     | IVb     |
| P162 | 59 | male   | lung adenocarcinoma       | Y | Y | T4      | N3      | M1      | IV      |
| P163 | 49 | male   | lung adenocarcinoma       | N | N | Ais     | N0      | M0      | 0       |
| P164 | 63 | female | lung adenocarcinoma       | N | N | T3      | N1      | M0      | IIIa    |
| P165 | 44 | male   | lung adenocarcinoma       | Y | N | T3      | N3      | M1      | IV      |
| P166 | 61 | male   | squamous cell carcinoma   | Y | Y | T4      | N2      | M1a     | IVa     |
| P167 | 68 | male   | lung adenocarcinoma       | Y | Y | T2a     | N2      | M0      | III     |
| P168 | 64 | male   | lung adenocarcinoma       | N | N | T2      | N0      | M0      | Ib      |
| P169 | 61 | female | lung adenocarcinoma       | N | N | T1      | N2      | M1      | IV      |
| P170 | 73 | male   | squamous cell carcinoma   | Y | Y | T4      | N2      | M0      | IIIa    |
| P171 | 68 | male   | squamous cell carcinoma   | Y | N | T4      | N2      | M0      | IIIa    |

|      |    |        |                               |   |   |         |         |         |      |
|------|----|--------|-------------------------------|---|---|---------|---------|---------|------|
| P172 | 73 | female | lung adenocarcinoma           | N | N | T1      | N0      | M0      | Ia   |
| P173 | 57 | female | lung adenocarcinoma           | N | N | T1      | N0      | M0      | Ia   |
| P174 | 54 | male   | squamous cell carcinoma       | Y | N | T2      | N2      | M0      | IIIa |
| P175 | 70 | male   | squamous cell carcinoma       | Y | N | T4      | N0      | M0      | IIIa |
| P176 | 68 | female | lung adenocarcinoma           | N | N | unknown | unknown | unknown | IV   |
| P177 | 65 | male   | lung adenocarcinoma           | Y | N | T1c     | N0      | M0      | Ia3  |
| P178 | 48 | female | lung adenocarcinoma           | N | N | Ais     | N0      | M0      | 0    |
| P179 | 75 | male   | lung adenocarcinoma           | N | N | T4      | N3      | M1      | IV   |
| P180 | 65 | male   | lung adenocarcinoma           | Y | Y | T2a     | N3      | M1c     | IVb  |
| P181 | 65 | male   | squamous cell carcinoma       | Y | N | T2      | N2      | M0      | IIIb |
| P182 | 56 | male   | squamous cell carcinoma       | Y | Y | T1      | N0      | M0      | Ia   |
| P183 | 52 | male   | lung adenocarcinoma           | Y | Y | T2      | N2      | M0      | III  |
| P184 | 85 | male   | squamous cell carcinoma       | Y | Y | T2      | N2      | M1      | IV   |
| P185 | 61 | female | lung adenocarcinoma           | N | N | T2      | N2      | M1c     | IVb  |
| P186 | 76 | male   | squamous cell carcinoma       | Y | Y | T2b     | N1      | M0      | IIB  |
| P187 | 65 | female | lung adenocarcinoma           | N | N | T1      | N0      | M0      | Ia   |
| P188 | 47 | male   | lung adenocarcinoma           | Y | N | T2      | N0      | M1      | IV   |
| P189 | 62 | male   | lung adenocarcinoma           | N | N | T4      | N3      | M1      | IV   |
| P190 | 66 | female | lung adenocarcinoma           | N | N | T2a     | N1      | M0      | IIa  |
| P191 | 42 | female | lung adenocarcinoma           | N | N | T2a     | N2      | M1      | IVa  |
| P192 | 44 | female | lung adenocarcinoma           | N | N | T4      | N3      | M1      | IV   |
| P193 | 62 | male   | squamous cell carcinoma       | Y | Y | T1      | N0      | M0      | Ia   |
| P194 | 64 | male   | cell neuroendocrine carcinoma | Y | Y | T1      | N0      | M0      | Ia   |
| P195 | 59 | female | lung adenocarcinoma           | N | N | T1b     | N0      | M0      | Ia   |
| P196 | 78 | male   | squamous cell carcinoma       | N | N | T2b     | N0      | M0      | IIa  |
| P197 | 51 | male   | lung adenocarcinoma           | Y | Y | T1      | N0      | M0      | Ia   |
| P198 | 47 | female | lung adenocarcinoma           | N | N | T1      | N0      | M0      | Ia   |
| P199 | 71 | male   | squamous cell carcinoma       | Y | Y | T2a     | N1      | M0      | IIa  |
| P200 | 69 | female | lung adenocarcinoma           | Y | Y | T2      | N3      | M0      | IIIb |
| P201 | 78 | male   | squamous cell carcinoma       | Y | Y | T3      | N3      | M0      | IIIb |
| P202 | 71 | male   | lung adenocarcinoma           | Y | Y | T1      | N3      | M0      | III  |
| P203 | 51 | male   | lung adenocarcinoma           | Y | Y | T4      | N3      | M1      | IV   |
| P204 | 53 | female | lung adenocarcinoma           | N | N | T1c     | N2      | M0      | III  |
| P205 | 52 | female | lung adenocarcinoma           | N | Y | T1b     | N0      | M0      | Ia   |
| P206 | 70 | female | lung adenocarcinoma           | N | N | T2b     | N2      | M1      | IVb  |
| P207 | 52 | female | lung adenocarcinoma           | N | N | T1      | N0      | M0      | Ia   |
| P208 | 51 | male   | lung adenocarcinoma           | Y | Y | T4      | N0      | M0      | IIIa |
| P209 | 72 | female | lung adenocarcinoma           | N | N | T2b     | N2      | M0      | IIIa |
| P210 | 55 | male   | lung adenocarcinoma           | Y | Y | T2      | N2      | M0      | IIIa |
| P211 | 69 | male   | squamous cell carcinoma       | Y | Y | T4      | N0      | M0      | IIIa |
| P212 | 54 | male   | lung adenocarcinoma           | Y | N | T1      | N0      | M0      | Ia   |
| P213 | 60 | male   | squamous cell carcinoma       | Y | Y | T2b     | N3      | M0      | IIIb |
| P214 | 72 | male   | lung adenocarcinoma           | Y | N | T1      | N0      | M0      | Ia   |
| P215 | 62 | male   | squamous cell carcinoma       | Y | Y | T2      | N0      | M0      | IIa  |
| P216 | 62 | male   | lung adenocarcinoma           | Y | Y | T1c     | N3      | M0      | III  |
| P217 | 72 | male   | lung adenocarcinoma           | Y | N | T2      | N3      | M0      | IIIb |
| P218 | 66 | male   | squamous cell carcinoma       | Y | Y | T2      | N0      | M0      | II   |
| P219 | 41 | male   | lung adenocarcinoma           | Y | N | T1c     | N0      | M0      | Ia3  |
| P220 | 63 | male   | lung adenocarcinoma           | Y | Y | T1      | N0      | M0      | Ia   |
| P221 | 52 | male   | lung adenocarcinoma           | N | N | T1      | N0      | M0      | Ia   |
| P222 | 58 | male   | lung adenocarcinoma           | Y | Y | T2      | N2      | M0      | IIIa |
| P223 | 69 | female | lung adenocarcinoma           | N | N | T1      | N0      | M0      | Ia   |
| P224 | 45 | male   | lung adenocarcinoma           | N | N | T4      | N2      | M0      | IIIb |
| P225 | 82 | male   | lung adenocarcinoma           | Y | N | T1      | N3      | M0      | III  |
| P226 | 54 | male   | squamous cell carcinoma       | Y | Y | T3      | N2      | M0      | IIIb |
| P227 | 74 | male   | lung adenocarcinoma           | Y | N | T2      | N0      | M0      | Ib   |
| P228 | 70 | female | lung adenocarcinoma           | Y | N | T1      | N0      | M0      | Ia   |
| P229 | 53 | male   | lung adenocarcinoma           | N | N | T2      | N0      | M0      | II   |
| P230 | 63 | male   | squamous cell carcinoma       | Y | N | T2      | N1      | M0      | IIB  |

|      |    |        |                         |   |   |     |    |     |     |
|------|----|--------|-------------------------|---|---|-----|----|-----|-----|
| P231 | 67 | male   | lung adenocarcinoma     | N | Y | T1b | N0 | M0  | Ia2 |
| P232 | 63 | male   | lung adenocarcinoma     | N | N | T1a | N0 | M0  | Ia1 |
| P233 | 48 | female | lung adenocarcinoma     | N | N | T2  | N0 | M0  | Ib  |
| P234 | 52 | female | lung adenocarcinoma     | N | N | T1  | N0 | M0  | Ia  |
| P235 | 45 | female | lung cancer             | N | N | T1  | N0 | M0  | Ia  |
| P236 | 51 | female | lung adenocarcinoma     | N | N | T1c | N1 | M0  | IIB |
| P237 | 76 | male   | squamous cell carcinoma | Y | Y | T3  | N0 | M0  | IIB |
| P238 | 58 | female | lung adenocarcinoma     | N | N | T1b | N0 | M0  | Ia2 |
| P239 | 49 | female | lung adenocarcinoma     | N | N | Ais | N0 | M0  | 0   |
| P240 | 60 | female | lung adenocarcinoma     | N | N | T2  | N0 | M0  | Ib  |
| P241 | 62 | male   | lung adenocarcinoma     | Y | N | T2  | N0 | M0  | Ib  |
| P242 | 67 | male   | lung adenocarcinoma     | Y | Y | T2  | N0 | M0  | Ib  |
| P243 | 62 | female | lung adenocarcinoma     | N | N | T2  | N0 | M0  | Ib  |
| P244 | 63 | male   | squamous cell carcinoma | Y | N | T1  | N0 | M0  | I   |
| P245 | 61 | male   | lung adenocarcinoma     | N | N | T1  | N0 | M0  | Ia  |
| P246 | 77 | male   | squamous cell carcinoma | Y | N | T1  | N0 | M0  | Ia  |
| P247 | 46 | female | lung adenocarcinoma     | N | N | T1  | N0 | M0  | Ia  |
| P248 | 64 | male   | squamous cell carcinoma | Y | N | T1b | N0 | M0  | Ia2 |
| P249 | 50 | female | lung adenocarcinoma     | N | N | T2a | N0 | M0  | Ib  |
| P250 | 59 | female | lung adenocarcinoma     | N | N | T1  | N0 | M0  | Ia  |
| P251 | 79 | female | squamous cell carcinoma | Y | N | T2  | N1 | M0  | IIB |
| P252 | 70 | male   | lung adenocarcinoma     | Y | Y | T2a | N0 | M0  | Ib  |
| P253 | 66 | male   | Adenosquamous carcinom  | Y | Y | T2  | N1 | M0  | IIB |
| P254 | 69 | male   | lung adenocarcinoma     | Y | Y | T1b | N1 | M0  | IIB |
| P255 | 66 | male   | squamous cell carcinoma | Y | N | T2  | N1 | M0  | IIB |
| P256 | 71 | female | lung adenocarcinoma     | N | N | T1c | N0 | M0  | Ia3 |
| P257 | 53 | male   | lung adenocarcinoma     | Y | Y | T1  | N0 | M0  | Ia  |
| P258 | 61 | female | lung adenocarcinoma     | N | N | T1b | N0 | M0  | Ia2 |
| P259 | 75 | male   | squamous cell carcinoma | Y | N | T3  | N0 | M0  | IIB |
| P260 | 53 | female | lung adenocarcinoma     | N | N | T2a | N0 | M0  | Ib  |
| P261 | 61 | male   | squamous cell carcinoma | Y | N | T2  | N1 | M0  | IIB |
| P262 | 59 | male   | lung adenocarcinoma     | Y | N | T2a | N0 | M0  | Ib  |
| P263 | 45 | female | lung adenocarcinoma     | N | N | T1b | N0 | M0  | Ia  |
| P264 | 73 | female | lung adenocarcinoma     | N | N | T1  | N0 | M0  | Ia  |
| P265 | 62 | female | lung adenocarcinoma     | N | N | T1  | N0 | M0  | Ia  |
| P266 | 55 | female | lung adenocarcinoma     | N | N | T1b | N0 | M0  | Ia2 |
| P267 | 53 | female | lung adenocarcinoma     | N | N | T1  | N0 | M0  | Ia  |
| P268 | 52 | male   | squamous cell carcinoma | Y | N | T2  | N0 | M0  | Ib  |
| P269 | 66 | female | lung adenocarcinoma     | N | N | T2a | N1 | M0  | IIB |
| P270 | 61 | female | lung adenocarcinoma     | N | N | T1  | N0 | M0  | Ia  |
| P271 | 68 | male   | lung adenocarcinoma     | N | N | T2  | N0 | M0  | IIB |
| P272 | 57 | female | lung adenocarcinoma     | N | N | T1  | N0 | M0  | Ia  |
| P273 | 69 | male   | lung adenocarcinoma     | Y | N | T2  | N2 | M1b | IVa |
| P274 | 61 | male   | lung adenocarcinoma     | Y | Y | T2  | N2 | M1  | IV  |
| P275 | 43 | female | lung adenocarcinoma     | N | N | T2  | N0 | M0  | Ia  |
| P276 | 69 | male   | lung adenocarcinoma     | N | N | T1  | N0 | M0  | Ia  |

| No   | Inpatient No | CEA    | CYFRA 21-1 | miRNA 20b-5p ( $\Delta$ CT) | miRNA 3187-5p ( $\Delta$ CT) |
|------|--------------|--------|------------|-----------------------------|------------------------------|
| P001 | 527411       | 3.73   | 6.62       | 2.485                       | 1.68                         |
| P002 | 527488       | 108.70 | 12.30      | 3.865                       | 2.095                        |
| P003 | 527384       | 15.94  | 3.62       | 3.405                       | 1.58                         |
| P004 | 527511       | 2.20   | unknown    | 4.115                       | 2.475                        |
| P005 | 527342       | 1.13   | 1.14       | 5.235                       | 3.635                        |
| P006 | 527501       | 2.20   | 4.92       | 3.54                        | 2.195                        |
| P007 | 527307       | 4.14   | 5.89       | 3.95                        | 3.195                        |
| P008 | 527603       | 0.91   | 3.18       | 3.985                       | 3.075                        |

|      |        |        |       |       |       |
|------|--------|--------|-------|-------|-------|
| P009 | 527863 | 5.50   | 2.24  | 2.575 | 1.695 |
| P010 | 527711 | 5.01   | 7.22  | 4.635 | 3.555 |
| P011 | 527713 | 2.46   | 21.86 | 4.95  | 3.08  |
| P012 | 527723 | 2.95   | 2.16  | 4.385 | 2.285 |
| P013 | 527725 | 3.47   | 2.05  | 4.525 | 1.86  |
| P014 | 529512 | 0.78   | 2.29  | 5.51  | 3.8   |
| P015 | 527735 | 1.12   | 1.49  | 3.415 | 1.59  |
| P016 | 527740 | 46.65  | 14.07 | 3.535 | 3.38  |
| P017 | 527749 | 1.46   | 2.11  | 4.715 | 2.565 |
| P018 | 527773 | 3.72   | 3.86  | 3.98  | 2.215 |
| P019 | 529704 | 4.16   | 2.65  | 4.94  | 2.38  |
| P020 | 527780 | 49.02  | 6.66  | 4.9   | 2.625 |
| P021 | 527810 | 749.70 | 5.66  | 4.97  | 3.36  |
| P022 | 529791 | 1.86   | 1.63  | 5.86  | 3.23  |
| P023 | 527822 | 17.32  | 5.86  | 5.17  | 3.205 |
| P024 | 527826 | 5.45   | 5.26  | 3.545 | 2.18  |
| P025 | 527838 | 2.00   | 1.19  | 1.525 | 3.27  |
| P026 | 527851 | 5.21   | 3.53  | 1.76  | 1.805 |
| P027 | 527890 | 1.12   | 3.45  | 4.29  | 3.01  |
| P028 | 527918 | 95.31  | 2.05  | 3.13  | 4.765 |
| P029 | 527927 | 5.28   | 7.99  | 3.4   | 3.895 |
| P030 | 527948 | 3.23   | 21.27 | 2.615 | 4.455 |
| P031 | 527953 | 1.21   | 2.10  | 2.255 | 4.44  |
| P032 | 527957 | 50.38  | 6.82  | 4.33  | 4.28  |
| P033 | 527968 | 2.54   | 1.55  | 5.645 | 3.155 |
| P034 | 528026 | 3.22   | 5.63  | 3.96  | 3.34  |
| P035 | 528071 | 2.24   | 10.74 | 3.97  | 4.355 |
| P036 | 528093 | 1.35   | 2.11  | 5.095 | 4.125 |
| P037 | 529788 | 12.98  | 4.97  | 2.625 | 2.885 |
| P038 | 528101 | 0.36   | 1.16  | 4.53  | 3.95  |
| P039 | 528103 | 5.78   | 1.30  | 2.885 | 3.705 |
| P040 | 528100 | 3.25   | 6.46  | 2.185 | 4.295 |
| P041 | 528140 | 2.83   | 9.74  | 2.65  | 3.07  |
| P042 | 528170 | 8.39   | 1.20  | 3.205 | 3.535 |
| P043 | 528206 | 7.83   | 15.69 | 3.745 | 4.42  |
| P044 | 528218 | 2.62   | 8.82  | 2.3   | 2.515 |
| P045 | 528253 | 41.85  | 2.54  | 2.38  | 3.945 |
| P046 | 528263 | 80.22  | 10.06 | 2.015 | 3.33  |
| P047 | 528269 | 2.43   | 64.94 | 2.12  | 4.42  |
| P048 | 528272 | 141.90 | 4.73  | 1.91  | 0.925 |
| P049 | 528276 | 4.83   | 2.43  | 2.23  | 2.09  |
| P050 | 528277 | 3.82   | 7.97  | 3.36  | 2.665 |
| P051 | 528550 | 3.35   | 4.55  | 3.495 | 2.69  |
| P052 | 528555 | 4.75   | 4.03  | 3.875 | 2.9   |
| P053 | 528564 | 25.41  | 9.44  | 4.145 | 2.935 |
| P054 | 528611 | 2.58   | 2.64  | 2.975 | 2.165 |
| P055 | 528632 | 2.08   | 1.09  | 2.41  | 1.715 |
| P056 | 528633 | 8.87   | 46.16 | 4.44  | 3.15  |
| P057 | 528670 | 2.78   | 18.22 | 4.64  | 3.825 |
| P058 | 528095 | 2.70   | 5.62  | 3.045 | 3.68  |
| P059 | 528736 | 7.21   | 14.51 | 3.435 | 2.815 |
| P060 | 528729 | 14.17  | 2.98  | 4.33  | 3.535 |
| P061 | 528678 | 4.38   | 4.76  | 3.72  | 2.555 |
| P062 | 528648 | 2.35   | 1.84  | 4.29  | 3.01  |
| P063 | 528556 | 2.06   | 4.50  | 2.965 | 2.545 |
| P064 | 528714 | 39.88  | 1.48  | 3.2   | 2.865 |
| P065 | 528730 | 1.74   | 2.62  | 3     | 3.28  |
| P066 | 528747 | 84.84  | 7.03  | 3.695 | 2.835 |
| P067 | 528757 | 35.94  | 2.65  | 3.265 | 3.425 |

|      |        |         |         |       |       |
|------|--------|---------|---------|-------|-------|
| P068 | 528771 | 3.33    | 3.84    | 3.21  | 2.505 |
| P069 | 528777 | 2.65    | 5.76    | 3.98  | 3.455 |
| P070 | 528781 | 2.29    | 6.91    | 2.43  | 3.09  |
| P071 | 528784 | 56.60   | 1.25    | 4.105 | 3.635 |
| P072 | 528791 | 378.70  | 6.33    | 3.59  | 2.81  |
| P073 | 528839 | 141.50  | 9.65    | 4.72  | 3.79  |
| P074 | 528893 | 1.83    | 13.94   | 4.66  | 3     |
| P075 | 528870 | 1549.00 | unknown | 5.94  | 4.39  |
| P076 | 529778 | 4.07    | 1.80    | 3.625 | 0.585 |
| P077 | 528913 | 2.84    | 2.26    | 4.47  | 3.52  |
| P078 | 528932 | 9.56    | 5.59    | 5.11  | 4.12  |
| P079 | 528889 | 4.15    | 3.82    | 5.695 | 4.53  |
| P080 | 528890 | 35.10   | 5.07    | 4.72  | 4.825 |
| P081 | 528968 | 1.65    | 3.31    | 3.225 | 2.8   |
| P082 | 528985 | 4.72    | 7.76    | 4.895 | 3.535 |
| P083 | 529002 | 44.93   | 24.86   | 6.295 | 5.255 |
| P084 | 529013 | 23.30   | 8.07    | 4.85  | 3.565 |
| P085 | 529032 | 6.59    | 20.42   | 5.26  | 4.43  |
| P086 | 529054 | 3.69    | 1.26    | 4.21  | 3.955 |
| P087 | 529089 | 2.38    | 17.89   | 4.255 | 3.67  |
| P088 | 529084 | 1.45    | 8.19    | 4.77  | 3.73  |
| P089 | 529053 | 39.72   | 2.92    | 3.03  | 2.55  |
| P090 | 528418 | 3.45    | 7.57    | 1.855 | 4.18  |
| P091 | 529138 | 7.60    | 3.28    | 4.905 | 3.775 |
| P092 | 529263 | 1.83    | 4.37    | 3.94  | 3.235 |
| P093 | 529238 | 134.00  | 3.64    | 3.25  | 0.65  |
| P094 | 529229 | 5.61    | 7.42    | 4.315 | 4.295 |
| P095 | 529221 | 2.25    | 5.80    | 4.035 | 2.36  |
| P096 | 529203 | 1.26    | 3.65    | 4.125 | 2.625 |
| P097 | 529198 | 3.15    | 4.02    | 5.145 | 3.225 |
| P098 | 527821 | 22.76   | 3.84    | 5.01  | 2.575 |
| P099 | 529180 | 41.49   | 4.26    | 5.18  | 3.155 |
| P100 | 529174 | 3.48    | 1.73    | 5.605 | 4.015 |
| P101 | 529156 | 17.78   | 7.82    | 5.035 | 3.455 |
| P102 | 529130 | 9.56    | 6.31    | 4.76  | 2.675 |
| P103 | 529265 | 3992.00 | 5.34    | 4.25  | 2.79  |
| P104 | 529279 | 11.24   | 25.57   | 4.45  | 2.93  |
| P105 | 529305 | 37.24   | 18.50   | 4.54  | 2.495 |
| P106 | 529312 | 19.85   | 7.70    | 3.84  | 2.875 |
| P107 | 529354 | 2.37    | 4.40    | 5.65  | 3.915 |
| P108 | 529348 | 3.70    | 5.70    | 6.065 | 4.71  |
| P109 | 529533 | 3.60    | 1.42    | 4.505 | 2.43  |
| P110 | 529524 | 9.06    | 7.08    | 4.915 | 3.13  |
| P111 | 529665 | 6.79    | 3.59    | 6.155 | 3.345 |
| P112 | 529461 | 259.00  | 71.86   | 4.465 | 2.33  |
| P113 | 529523 | 8.03    | 5.02    | 3.515 | 1.72  |
| P114 | 529561 | 5.13    | 2.22    | 5.185 | 3.15  |
| P115 | 529534 | 19.89   | 5.12    | 5.2   | 3.37  |
| P116 | 529572 | 36.41   | 7.38    | 5.085 | 3.225 |
| P117 | 529806 | 4.7     | 1.94    | 3.815 | 1.32  |
| P118 | 529764 | 2.18    | 1.92    | 4.55  | 1.93  |
| P119 | 529709 | 2.29    | 1.34    | 5.135 | 2.4   |
| P120 | 529705 | 2.25    | 2.12    | 5.72  | 3.725 |
| P121 | 530166 | 40.9    | 8.3     | 4.185 | 1.475 |
| P122 | 529728 | 0.43    | 1.22    | 4.355 | 3.015 |
| P123 | 529675 | 1.28    | 1.37    | 4.85  | 2.095 |
| P124 | 527732 | 1.40    | 11.36   | 5.325 | 3.525 |
| P125 | 529661 | 3.8     | 1.33    | 6.17  | 3.455 |
| P126 | 529659 | 1.93    | 2.98    | 5.75  | 3.26  |

|      |        |       |       |       |       |
|------|--------|-------|-------|-------|-------|
| P127 | 529658 | 1.96  | 1.92  | 4.77  | 2.415 |
| P128 | 527774 | 5.35  | 4.65  | 5.68  | 3.535 |
| P129 | 529821 | 4.65  | 5.47  | 4.825 | 2.555 |
| P130 | 529845 | 1.26  | 2.19  | 5.235 | 2.785 |
| P131 | 529982 | 3.57  | 1.74  | 5.685 | 3.08  |
| P132 | 529926 | 3.03  | 2.5   | 4.93  | 2.485 |
| P133 | 529975 | 4.31  | 3.24  | 5.365 | 2.85  |
| P134 | 530043 | 1.74  | 1.14  | 5.455 | 3.1   |
| P135 | 530010 | 125   | 3.89  | 5.575 | 2.895 |
| P136 | 529915 | 3.82  | 6.41  | 6.05  | 3.87  |
| P137 | 528742 | 5.75  | 1.77  | 3.915 | 2.58  |
| P138 | 530219 | 8.42  | 5.33  | 4.59  | 2.14  |
| P139 | 530181 | 1.56  | 2.49  | 4.95  | 2.415 |
| P140 | 528744 | 0.82  | 1.04  | 3.86  | 1.495 |
| P141 | 528875 | 1.88  | 0.97  | 4.46  | 2.305 |
| P142 | 529063 | 7.56  | 1.17  | 5.455 | 3.005 |
| P143 | 528931 | 1.94  | 1.65  | 5.105 | 2.97  |
| P144 | 528956 | 1.1   | 2.62  | 6.915 | 3.99  |
| P145 | 528845 | 6.39  | 3.13  | 5.415 | 4.275 |
| P146 | 529350 | 1.93  | 3.56  | 4.085 | 2.035 |
| P147 | 529458 | 5.15  | 5.28  | 3     | 1.215 |
| P148 | 529441 | 63.26 | 16.76 | 5.535 | 3.81  |
| P149 | 529749 | 6.95  | 8.72  | 6.23  | 4.24  |
| P150 | 529734 | 18.32 | 11.17 | 4.62  | 2.575 |
| P151 | 529648 | 4.93  | 2.95  | 4.755 | 2.345 |
| P152 | 529606 | 2.15  | 4.85  | 3.765 | 2     |
| P153 | 529669 | 3.34  | 6.42  | 4.69  | 4.495 |
| P154 | 529046 | 63.6  | 5.1   | 3.48  | 1.71  |
| P155 | 529251 | 88.5  | 46.56 | 3.375 | 3.23  |
| P156 | 529682 | 11.02 | 1.56  | 4.18  | 4.15  |
| P157 | 529634 | 0.93  | 2.24  | 3.895 | 4.16  |
| P158 | 529777 | 32.7  | 1.82  | 3.325 | 2.635 |
| P159 | 529143 | 2.3   | 3.15  | 4.69  | 2.35  |
| P160 | 529799 | 66.49 | 4.24  | 4.36  | 3.99  |
| P161 | 529810 | 10.76 | 4.71  | 3.65  | 3.855 |
| P162 | 529824 | 3.22  | 3.63  | 3.96  | 4.34  |
| P163 | 529829 | 1.02  | 2.37  | 3.945 | 4.025 |
| P164 | 529837 | 3.34  | 15.96 | 3.795 | 3.51  |
| P165 | 529861 | 125.4 | 6.08  | 4.49  | 5.065 |
| P166 | 529877 | 1.34  | 3.25  | 3.145 | 4.16  |
| P167 | 529884 | 3.08  | 1.27  | 4.5   | 3.77  |
| P168 | 529910 | 1.42  | 1.75  | 4.515 | 4.215 |
| P169 | 529917 | 73.76 | 5.39  | 4.48  | 4.085 |
| P170 | 530005 | 3.31  | 3.24  | 1.415 | 1.26  |
| P171 | 530026 | 17.46 | 28.75 | 3.71  | 2.965 |
| P172 | 530075 | 2.62  | 2.5   | 3.685 | 3.085 |
| P173 | 530073 | 2.73  | 4.14  | 3.87  | 3.375 |
| P174 | 530049 | 4.72  | 13.44 | 3.81  | 3.37  |
| P175 | 530008 | 14.08 | 28.09 | 4.09  | 4.325 |
| P176 | 530135 | 392.8 | 5.39  | 3.715 | 4.18  |
| P177 | 530129 | 1.98  | 2.08  | 4.565 | 2.715 |
| P178 | 530126 | 0.89  | 2.55  | 3.82  | 2.465 |
| P179 | 530125 | 5.23  | 13.43 | 4.93  | 1.635 |
| P180 | 529991 | 3.97  | 133.5 | 2.745 | 2.585 |
| P181 | 530280 | 3.45  | 3.51  | 3.81  | 2.205 |
| P182 | 530226 | 2.5   | 4.81  | 3.205 | 3.45  |
| P183 | 530223 | 88.76 | 7.99  | 2.965 | 3.735 |
| P184 | 530216 | 5.34  | 38.11 | 4.3   | 2.61  |
| P185 | 530203 | 18.91 | 4.96  | 5.035 | 3.56  |



|      |        |         |         |       |       |
|------|--------|---------|---------|-------|-------|
| P186 | 530201 | 5.93    | 9.81    | 2.84  | 3.055 |
| P187 | 530071 | 0.8     | 3.72    | 4.005 | 2.415 |
| P188 | 530335 | 29.32   | 2.47    | 4.665 | 3.905 |
| P189 | 530332 | 835.5   | 4.95    | 4.655 | 3.18  |
| P190 | 530327 | 4.95    | 1.22    | 4.17  | 3.43  |
| P191 | 530326 | 3.65    | 3.39    | 4.39  | 3.98  |
| P192 | 530361 | 10.29   | 17.19   | 1.665 | 2.41  |
| P193 | 530363 | unknown | unknown | 4.705 | 3.905 |
| P194 | 530403 | 11.37   | 2.68    | 3.29  | 1.325 |
| P195 | 530417 | 2.12    | 1.77    | 3.07  | 2.41  |
| P196 | 530452 | 2.09    | 5.36    | 4.515 | 2.92  |
| P197 | 530455 | 10.48   | 1.86    | 4.94  | 3.215 |
| P198 | 530464 | 2.53    | 1.41    | 3.73  | 2.445 |
| P199 | 530482 | 5.15    | 16.08   | 3.785 | 2.66  |
| P200 | 530511 | 117.5   | 9.81    | 4.12  | 3.315 |
| P201 | 530666 | 1.49    | 11.55   | 4.28  | 2.255 |
| P202 | 530578 | 4.52    | 3.18    | 4.265 | 1.985 |
| P203 | 530692 | 51.03   | 41.8    | 2.275 | 1.72  |
| P204 | 530695 | 9.68    | 1.52    | 3.91  | 2.23  |
| P205 | 530696 | 1.92    | 1.89    | 3.93  | 2.825 |
| P206 | 530706 | 4.65    | 4.54    | 3.765 | 3.105 |
| P207 | 530708 | 2.34    | 2.55    | 3.565 | 3.155 |
| P208 | 530711 | 5.54    | 3.67    | 4.32  | 3.425 |
| P209 | 530726 | 4.22    | 2.39    | 2.01  | 3.46  |
| P210 | 530734 | 5.63    | 1.32    | 3.4   | 2.39  |
| P211 | 530747 | unknown | unknown | 3.845 | 3.515 |
| P212 | 530860 | 25.76   | 1.49    | 4.555 | 3.365 |
| P213 | 530859 | 2.49    | 20.1    | 3.755 | 2.615 |
| P214 | 530819 | 2.15    | 9.89    | 3.84  | 2.985 |
| P215 | 530777 | 3.38    | 4.19    | 3.84  | 2.825 |
| P216 | 530731 | 11.8    | 3.61    | 3.8   | 2.05  |
| P217 | 531202 | 9.11    | 8.8     | 4.58  | 3.11  |
| P218 | 531172 | 2       | 2.33    | 3.66  | 2.535 |
| P219 | 531266 | 1.85    | 1.8     | 3.78  | 2.755 |
| P220 | 530663 | 7.98    | 1.77    | 4.53  | 3.42  |
| P221 | 530864 | 2.88    | 1.54    | 4.33  | 2.23  |
| P222 | 531180 | 1.14    | 2.54    | 4.625 | 3.615 |
| P223 | 531162 | 7.58    | 2.72    | 3.835 | 2.91  |
| P224 | 531296 | 4.6     | 1.42    | 3.525 | 2.255 |
| P225 | 531263 | 3.06    | 1.87    | 4.8   | 3.48  |
| P226 | 531232 | 8.8     | 12      | 5.515 | 4.58  |
| P227 | 531223 | 2.25    | 2.48    | 4.99  | 3.01  |
| P228 | 531324 | 0.83    | 4.71    | 2.26  | 0.93  |
| P229 | 531435 | 2.63    | 2.51    | 3.14  | 2.395 |
| P230 | 531408 | 7.02    | 13.64   | 3.695 | 2.78  |
| P231 | 531624 | 2.74    | 2.22    | 3.555 | 2.415 |
| P232 | 531711 | 1.88    | 1.65    | 4.8   | 3.785 |
| P233 | 531710 | 1.31    | 1.37    | 4.14  | 1.765 |
| P234 | 531702 | 3.4     | 2.17    | 2.745 | 1.095 |
| P235 | 531638 | 2.28    | 1.4     | 2.61  | 2.205 |
| P236 | 531633 | 2.4     | 2.04    | 1.52  | 1.295 |
| P237 | 531529 | 5.16    | 78.1    | 4.31  | 3.555 |
| P238 | 531830 | 3.59    | 1.57    | 3.07  | 4.185 |
| P239 | 531827 | 1.63    | 1.41    | 2.315 | 3.16  |
| P240 | 531706 | 1.8     | 1.58    | 0.855 | 2.04  |
| P241 | 531697 | 7.68    | 4.76    | 2.885 | 3.255 |
| P242 | 532131 | 7.16    | 1.88    | 4.17  | 5.69  |
| P243 | 532075 | 2.98    | 1.88    | 3.2   | 3.99  |
| P244 | 530898 | 2.08    | 4.5     | 4.855 | 4.505 |

|      |        |         |         |       |       |
|------|--------|---------|---------|-------|-------|
| P245 | 531321 | 0.64    | 1.36    | 2.85  | 2.355 |
| P246 | 531589 | 5.11    | 2.33    | 4.11  | 4.065 |
| P247 | 532050 | 0.78    | 0.99    | 3.04  | 5.27  |
| P248 | 532245 | 4.7     | 1.38    | 4.86  | 5.12  |
| P249 | 532231 | 3       | 0.8     | 4.815 | 5.17  |
| P250 | 532157 | 6.12    | 1.79    | 4.895 | 4.355 |
| P251 | 532146 | 20.42   | 2.91    | 3.17  | 3.71  |
| P252 | 532385 | 4.89    | 3.23    | 2.83  | 3.355 |
| P253 | 532738 | 2.8     | 4.45    | 3.125 | 2.875 |
| P254 | 532876 | 13.06   | 4.04    | 4.9   | 4.38  |
| P255 | 533114 | 2.63    | 7.27    | 2.58  | 1.285 |
| P256 | 533187 | unknown | unknown | 4.07  | 4.575 |
| P257 | 533264 | unknown | unknown | 2.38  | 3.735 |
| P258 | 533392 | 4.16    | 2.01    | 1.355 | 2.49  |
| P259 | 533290 | 5.15    | 8.89    | 4.315 | 3.465 |
| P260 | 533387 | 2.04    | 2.12    | 3.69  | 3.38  |
| P261 | 533687 | 1.94    | 2.25    | 3.485 | 3.595 |
| P262 | 533648 | 2.9     | 2.71    | 3.67  | 3.81  |
| P263 | 533831 | 2.24    | 3.06    | 2.41  | 3.92  |
| P264 | 533769 | 2.96    | 2.13    | 3.69  | 4.345 |
| P265 | 534302 | 2.47    | 4.01    | 4.005 | 3.95  |
| P266 | 534298 | 2.27    | 1.05    | 3.71  | 3.98  |
| P267 | 534374 | 2.29    | 1.49    | 4.22  | 4.51  |
| P268 | 534418 | 2.12    | 7.47    | 3.45  | 3.62  |
| P269 | 534405 | 10.56   | 2.62    | 3.63  | 3.315 |
| P270 | 534610 | 3.14    | 0.9     | 3.32  | 2.575 |
| P271 | 534566 | 2.92    | 2.64    | 3.74  | 3.91  |
| P272 | 531839 | 2.17    | 2.54    | 0.79  | 1.375 |
| P273 | 532560 | 801.8   | 9.66    | 2.825 | 2.38  |
| P274 | 532393 | 79.53   | 2.79    | 2.3   | 1.82  |
| P275 | 532632 | 1.21    | 3.07    | 1.295 | 0.85  |
| P276 | 532878 | 2.34    | 2.55    | 1.98  | 1.5   |

Table S2 Clinical and pathological characteristics of healthy controls

| No   | ID        | gender | age (year) | miRNA-20b-5p ( $\Delta$ CT) | miRNA-3187-5p ( $\Delta$ CT) |
|------|-----------|--------|------------|-----------------------------|------------------------------|
| H001 | 180116111 | female | 54         | 1.96                        | 2.52                         |
| H002 | 18011732  | female | 56         | 2.49                        | 2.745                        |
| H003 | 18011656  | female | 41         | 1.57                        | 2.145                        |
| H004 | 18011719  | female | 53         | 2.325                       | 3.16                         |
| H005 | 18011658  | male   | 53         | 1.83                        | 2.62                         |
| H006 | 18011720  | male   | 49         | 2.025                       | 2.845                        |
| H007 | 18011737  | female | 73         | 3.315                       | 3.99                         |
| H008 | 18011735  | female | 64         | 2.875                       | 3.525                        |
| H009 | 18011647  | female | 64         | 2.14                        | 3.105                        |
| H010 | 18011747  | male   | 47         | 2.585                       | 3.53                         |
| H011 | 18011649  | male   | 66         | 1.75                        | 2.325                        |
| H012 | 180119301 | male   | 58         | 2.86                        | 3.755                        |
| H013 | 180118041 | female | 46         | 1.495                       | 0.31                         |
| H014 | 180118051 | male   | 44         | 0.935                       | 2.165                        |
| H015 | 180118351 | female | 41         | 2.095                       | 2.865                        |
| H016 | 180118361 | female | 50         | 1.11                        | 2.555                        |
| H017 | 180118381 | male   | 53         | 1.63                        | 2.74                         |
| H018 | 180118391 | male   | 43         | 2.065                       | 2.905                        |
| H019 | 180118401 | male   | 56         | 2.59                        | 4.35                         |
| H020 | 180118441 | female | 43         | 3.54                        | 1.495                        |

|      |            |        |    |       |       |
|------|------------|--------|----|-------|-------|
| H021 | 180118471  | female | 42 | 5.845 | 6.55  |
| H022 | 180118481  | female | 45 | 3.57  | 5.875 |
| H023 | 180118491  | male   | 47 | 2.25  | 3.965 |
| H024 | 180118511  | female | 49 | 2.43  | 4.13  |
| H025 | 180118521  | male   | 51 | 0.77  | 2.86  |
| H026 | 180118531  | female | 51 | 1     | 3.1   |
| H027 | 180118541  | female | 56 | 0.845 | 2.92  |
| H028 | 180118551  | female | 60 | 0.905 | 2.905 |
| H029 | 180118571  | male   | 62 | -2.66 | -0.34 |
| H030 | 180118611  | male   | 55 | 0.25  | 2.325 |
| H031 | 180118621  | female | 55 | 1.285 | 3.915 |
| H032 | 180118631  | female | 44 | 1.58  | 3.545 |
| H033 | 180118641  | female | 51 | 0.93  | 3.31  |
| H034 | 180118651  | female | 43 | -1.73 | 0.545 |
| H035 | 180118671  | male   | 53 | 0.99  | 3     |
| H036 | 180118681  | male   | 46 | 0.435 | 2.64  |
| H037 | 180118691  | male   | 51 | 2.155 | 1.45  |
| H038 | 180118701  | female | 52 | 5.025 | 4.145 |
| H039 | 180118711  | female | 50 | 3.465 | 1.695 |
| H040 | 180118731  | female | 53 | 3.39  | 2.875 |
| H041 | 180118741  | female | 53 | 3.935 | 3.34  |
| H042 | 180118751  | male   | 58 | 3     | 2.385 |
| H043 | 180118781  | male   | 64 | 2.855 | 2.465 |
| H044 | 180118791  | female | 58 | 3.35  | 2.805 |
| H045 | 180118811  | male   | 55 | 3.3   | 2.56  |
| H046 | 180118821  | male   | 62 | 3.85  | 3.44  |
| H047 | 180118831  | female | 61 | 3.095 | 2.39  |
| H048 | 180118841  | female | 56 | 1.87  | 3.215 |
| H049 | 180118881  | male   | 65 | 3.4   | 2.825 |
| H050 | 180118921  | male   | 65 | 3.75  | 3.505 |
| H051 | 180118961  | female | 61 | 4.11  | 2.935 |
| H052 | 180118981  | male   | 55 | 3.37  | 3.03  |
| H053 | 180119001  | male   | 61 | 3.05  | 2.135 |
| H054 | 180119011  | male   | 62 | 3.955 | 3.905 |
| H055 | 180119021  | male   | 62 | 2.49  | 3.685 |
| H056 | 180119031  | male   | 60 | 2.13  | 3.245 |
| H057 | 180119291  | male   | 70 | 2.635 | 2.525 |
| H058 | 180119061  | female | 55 | 3.54  | 2.93  |
| H059 | 180119111  | male   | 60 | 3.99  | 1.77  |
| H060 | 180119131  | female | 53 | 3.6   | 2.115 |
| H061 | 180119181  | female | 48 | 4.325 | 2.73  |
| H062 | 180119221  | male   | 66 | 3.61  | 2.12  |
| H063 | 18011837   | female | 62 | 2.86  | 1.95  |
| H064 | 18011963   | male   | 68 | 4.255 | 2.725 |
| H065 | 18011961   | female | 58 | 3.755 | 2.41  |
| H066 | 18011964   | female | 64 | 3.33  | 1.695 |
| H067 | 18011944   | female | 47 | 5.515 | 3.47  |
| H068 | 18011005   | female | 55 | 4.11  | 2.02  |
| H069 | 18011945   | female | 47 | 3.87  | 2.735 |
| H070 | 18011962   | female | 55 | 4.45  | 3.415 |
| H071 | 18011912   | female | 50 | 4.045 | 1.895 |
| H072 | 18012101   | female | 62 | 4.915 | 2.9   |
| H073 | 18011902   | male   | 59 | 4.11  | 2.15  |
| H074 | 18011946   | female | 54 | 4.425 | 2.735 |
| H075 | 18011992-3 | male   | 62 | 4.315 | 3.14  |
| H076 | 18012004-3 | male   | 61 | 4.205 | 2.475 |
| H077 | 18012010-3 | male   | 67 | 2.32  | 2.84  |
| H078 | 18012011-3 | male   | 52 | 5.085 | 2.55  |
| H079 | 18012009-3 | male   | 64 | 4.15  | 2.24  |

|      |            |        |    |       |        |
|------|------------|--------|----|-------|--------|
| H080 | 18011998-3 | female | 53 | 2.99  | 3.055  |
| H081 | 18012014-3 | male   | 55 | 2.64  | 3.06   |
| H082 | 18012002-3 | male   | 65 | 4.05  | 2.87   |
| H083 | 18012013-3 | female | 42 | 4.07  | 1.485  |
| H084 | 18012003-3 | female | 63 | 3.78  | 1.075  |
| H085 | 18011941-3 | female | 51 | 4.655 | 2.095  |
| H086 | 18012012-3 | female | 46 | 3.95  | 3.19   |
| H087 | 18011989-3 | male   | 60 | 2.86  | 3.735  |
| H088 | 18012066-3 | male   | 72 | 4.5   | 1.96   |
| H089 | 18012080-3 | female | 46 | 4.335 | 2.18   |
| H090 | 18012076-3 | female | 53 | 2.085 | 2.365  |
| H091 | 18012070-3 | female | 53 | 3.825 | 2.76   |
| H092 | 18012071-3 | female | 53 | -0.22 | 1.83   |
| H093 | 18012058-3 | female | 64 | 2.47  | 1.995  |
| H094 | 18012103-3 | female | 53 | 2.475 | 1.865  |
| H095 | 18012107-3 | female | 49 | 2.205 | 1.115  |
| H096 | 18012104-3 | male   | 55 | -0.03 | 0.39   |
| H097 | 18012068-3 | female | 46 | 2.725 | 1.12   |
| H098 | 18012081-3 | female | 56 | 1.625 | 0.595  |
| H099 | 18012095-3 | male   | 59 | 0.06  | 1.03   |
| H100 | 18012110-3 | female | 66 | 1.67  | 4.82   |
| H101 | 18012109-3 | female | 47 | 1.51  | 0.94   |
| H102 | 18012042-3 | female | 49 | 2.13  | 0.07   |
| H103 | 18012001-3 | female | 56 | 0.77  | -2.855 |
| H104 | 18012063-3 | female | 62 | 2.5   | 0.045  |
| H105 | 18012069-3 | female | 67 | 1.86  | -0.085 |
| H106 | 18012077-3 | female | 73 | 0.505 | 0.26   |
| H107 | 18012057-3 | female | 53 | 2.13  | -0.375 |
| H108 | 18012098-3 | female | 56 | 1.25  | 1.54   |
| H109 | 18012092-3 | male   | 49 | 1.98  | -0.12  |
| H110 | 18012067-6 | female | 56 | 0     | -2     |
| H111 | 18012102-3 | female | 63 | 1.675 | -0.065 |
| H112 | 18012020-3 | male   | 56 | 2.985 | -0.77  |
| H113 | 18012062-3 | male   | 64 | 0.98  | 0.19   |
| H114 | 18012045-6 | female | 46 | 2.195 | 0.23   |
| H115 | 18012075-3 | male   | 61 | 2.62  | -0.2   |
| H116 | 18012061-6 | female | 53 | 2.475 | 0.615  |
| H117 | 18012089-3 | male   | 57 | 2.565 | -1.95  |
| H118 | 18012105-3 | female | 43 | 4.065 | 1.295  |
| H119 | 18012048-3 | female | 56 | 4.52  | 1.01   |
| H120 | 18012090-3 | male   | 45 | 4.605 | 0.44   |
| H121 | 18012043-3 | male   | 48 | 2.43  | 1.17   |
| H122 | 18012000-3 | female | 56 | 2.805 | 0.82   |
| H123 | 18012085-3 | male   | 52 | 5.365 | 0.9    |
| H124 | 18012097-3 | female | 47 | 2.875 | 1.76   |
| H125 | 18012056-3 | female | 59 | 4.875 | 1.825  |
| H126 | 18012054-3 | female | 47 | 4.455 | 2.67   |
| H127 | 18012082-3 | male   | 60 | 3.455 | 1.605  |
| H128 | 18012079-3 | male   | 66 | 5.06  | 2.515  |
| H129 | 18012064-3 | female | 64 | 3.98  | 0.91   |
| H130 | 18012022-6 | female | 74 | 4.465 | 0.47   |
| H131 | 18012049-3 | female | 62 | 4.215 | 1.94   |
| H132 | 18012055   | male   | 61 | 4.01  | 2.08   |
| H133 | 18012046-3 | female | 41 | 2.61  | 1.835  |
| H134 | 18012099-3 | male   | 55 | 4.28  | 1.355  |
| H135 | 18012570-3 | male   | 54 | 2.905 | 2.09   |
| H136 | 18012582-3 | female | 66 | 3.62  | 0.6    |
| H137 | 18012157-3 | male   | 56 | 2.51  | 1.505  |
| H138 | 18012527-3 | male   | 56 | 2.875 | -1.37  |

|      |            |        |    |        |        |
|------|------------|--------|----|--------|--------|
| H139 | 18012545-3 | female | 44 | 2.94   | 0.945  |
| H140 | 18012540-3 | female | 61 | 2.855  | 1.49   |
| H141 | 18012006-3 | female | 52 | 1.82   | 2.635  |
| H142 | 18012007-3 | male   | 45 | 2.6    | 2.755  |
| H143 | 18011942-3 | male   | 50 | 0.38   | 3.845  |
| H144 | 18011991-3 | female | 63 | 3.145  | 3.415  |
| H145 | 18012005-3 | female | 62 | 2.54   | 0.55   |
| H146 | 18012008-3 | male   | 53 | 1.92   | 4.01   |
| H147 | 18012517-3 | female | 62 | 2.555  | 3.26   |
| H148 | 18012350-3 | female | 54 | 2.27   | 2.175  |
| H149 | 18012600-3 | female | 69 | 1.32   | 5.25   |
| H150 | 18012531-6 | male   | 72 | 3.79   | 4.63   |
| H151 | 18012564-3 | male   | 54 | 3.075  | 3.26   |
| H152 | 18012573-3 | female | 60 | 2.725  | 3.055  |
| H153 | 18012546-3 | male   | 47 | 0.085  | 1.73   |
| H154 | 18012016-3 | male   | 45 | 1.035  | 2.76   |
| H155 | 18012515-3 | female | 69 | -0.785 | 2.19   |
| H156 | 18012589-3 | female | 57 | 2.53   | 2.815  |
| H157 | 18012538-3 | female | 70 | -1.375 | 2.455  |
| H158 | 18012610-3 | male   | 43 | -1.045 | 2.04   |
| H159 | 18012572-3 | male   | 72 | -2.5   | 1.09   |
| H160 | 18012549-3 | female | 60 | -1.32  | 2.79   |
| H161 | 18012550-3 | female | 40 | 0.56   | 1.24   |
| H162 | 18012583-3 | female | 72 | 1.28   | 2.215  |
| H163 | 18012599-3 | male   | 51 | 0.055  | 1.915  |
| H164 | 18012511-6 | male   | 70 | 1.26   | 1.165  |
| H165 | 18012530-6 | male   | 69 | 0.45   | 2.725  |
| H166 | 18012542-3 | male   | 71 | 0.585  | 2.585  |
| H167 | 18012266-3 | female | 54 | -1.245 | 2.235  |
| H168 | 18012341-2 | male   | 46 | 0.08   | 1.825  |
| H169 | 18012339-3 | male   | 66 | -1.13  | 1.84   |
| H170 | 18012274-3 | female | 65 | -0.475 | 0.99   |
| H171 | 18012313-3 | female | 64 | -0.555 | 2.31   |
| H172 | 18012342-3 | female | 67 | -1.465 | 2.01   |
| H173 | 18012264-3 | male   | 54 | 0.72   | 1.465  |
| H174 | 18012250-3 | male   | 49 | 2.915  | 1.36   |
| H175 | 18012323-3 | female | 72 | 2.655  | 1.88   |
| H176 | 18012321-6 | female | 66 | 2.335  | 0.93   |
| H177 | 18012324-6 | male   | 65 | 2.575  | 1.935  |
| H178 | 18012280-3 | female | 61 | 3.28   | 1.71   |
| H179 | 18012268-2 | female | 51 | 2.35   | -2.75  |
| H180 | 18012270-3 | male   | 65 | 3.465  | -3.385 |
| H181 | 18012309-2 | female | 66 | 0.12   | -1.67  |
| H182 | 18012262-3 | male   | 53 | 1.565  | 3.25   |
| H183 | 18012239-3 | male   | 69 | 0.62   | -3.05  |
| H184 | 18012301-2 | male   | 61 | 0.055  | -2.715 |
| H185 | 18012335-3 | female | 54 | 2.655  | -2.385 |
| H186 | 18012269-3 | female | 50 | 3.795  | -0.695 |
| H187 | 18012300-3 | male   | 45 | 3.215  | -1.195 |
| H188 | 18012258-3 | female | 45 | 0.41   | -3.22  |
| H189 | 18012329-3 | male   | 58 | 2.98   | -1.91  |
| H190 | 18012240-3 | female | 65 | 3.995  | -1.68  |
| H191 | 18012278-3 | female | 54 | 2.365  | -2.22  |
| H192 | 18012310-3 | male   | 72 | 3.14   | -3.39  |
| H193 | 18012289-3 | male   | 66 | 3.4    | -2.52  |
| H194 | 18012247-3 | female | 47 | 3.57   | -1.805 |
| H195 | 18012598-3 | female | 44 | 3.86   | -4.665 |
| H196 | 18012611-3 | female | 58 | 2.99   | -3.34  |
| H197 | 18012603-3 | male   | 44 | 2.535  | -3.075 |

|      |            |        |    |        |        |
|------|------------|--------|----|--------|--------|
| H198 | 18012529-3 | male   | 71 | 2.875  | -4.28  |
| H199 | 18012547-3 | female | 62 | 3.015  | 3.295  |
| H200 | 18012351-3 | male   | 54 | 1.18   | 2.37   |
| H201 | 18012526-3 | female | 53 | 3.325  | 4.63   |
| H202 | 18012512-3 | male   | 66 | 1.805  | 4.16   |
| H203 | 18012541-3 | male   | 56 | 2.16   | 4.185  |
| H204 | 18012535-3 | male   | 49 | 2.645  | 4.015  |
| H205 | 18012571-3 | male   | 61 | 3.755  | 3.725  |
| H206 | 18012586-3 | male   | 63 | 0.79   | 1.32   |
| H207 | 18012563-3 | male   | 54 | 3.01   | 4.185  |
| H208 | 18012602-3 | female | 44 | 4.09   | 4.38   |
| H209 | 18012509-3 | female | 62 | 3.375  | 3.12   |
| H210 | 18012543-6 | male   | 55 | 1.81   | 4.025  |
| H211 | 18012514-3 | male   | 71 | 3.06   | 1.905  |
| H212 | 18012536-6 | female | 51 | 2.72   | 2.515  |
| H213 | 18012516-3 | male   | 62 | 3.215  | 2.36   |
| H214 | 18012510-3 | male   | 46 | 2.39   | 3.25   |
| H215 | 18012554-3 | female | 55 | 3.995  | 2.615  |
| H216 | 18012585-3 | female | 56 | 2.79   | 4.165  |
| H217 | 18012485-3 | male   | 51 | 1.805  | 4.1    |
| H218 | 18012504-3 | female | 51 | 4.65   | 4.425  |
| H219 | 18012466-3 | male   | 68 | 3.95   | 0.035  |
| H220 | 18012482-3 | male   | 43 | 3.655  | 2.21   |
| H221 | 18012469-3 | female | 52 | 3.825  | 2.005  |
| H222 | 18011834-3 | male   | 62 | 2.69   | 2.03   |
| H223 | 18012473-3 | male   | 61 | 4.075  | 1.88   |
| H224 | 18012479-3 | female | 59 | 2.99   | 3.55   |
| H225 | 18012477-3 | female | 55 | 3.28   | 2.145  |
| H226 | 18012500-3 | male   | 45 | 1.68   | 3.065  |
| H227 | 18012493-3 | female | 45 | 2.935  | 1.185  |
| H228 | 18012483-3 | female | 41 | 4.18   | 1.805  |
| H229 | 18012490-3 | male   | 52 | 3.34   | 0.105  |
| H230 | 18012472-3 | female | 51 | 3.73   | 0.955  |
| H231 | 18012503-3 | female | 53 | 2.925  | 3.155  |
| H232 | 18012488-3 | female | 48 | 0.625  | 3.81   |
| H233 | 18012478-3 | female | 42 | 1.465  | 0.99   |
| H234 | 18012495-3 | male   | 55 | 1.215  | 1.55   |
| H235 | 18012481-3 | female | 61 | 0.675  | 3.05   |
| H236 | 18012459-3 | female | 69 | -0.335 | 4.13   |
| H237 | 18012486-3 | female | 55 | 1.525  | 2.14   |
| H238 | 18012476-3 | female | 60 | 1.09   | 2.925  |
| H239 | 18012501-3 | female | 50 | 2.225  | 3.95   |
| H240 | 18012480-3 | female | 52 | 2.41   | 3.075  |
| H241 | 18012492-3 | male   | 56 | 0.595  | 4.03   |
| H242 | 18012476-3 | female | 60 | 1.99   | 3.7    |
| H243 | 18012236-3 | female | 43 | 1.4    | 2.635  |
| H244 | 18012199-3 | female | 43 | 1.835  | 2.375  |
| H245 | 18012226-3 | female | 42 | 1.295  | 3.635  |
| H246 | 18012188-3 | female | 49 | 1.58   | -1.195 |
| H247 | 18012174-3 | female | 67 | 1.715  | 3.3    |
| H248 | 18012184-3 | female | 41 | 0.2    | 3.125  |
| H249 | 18012167-3 | male   | 42 | 0.83   | 3.175  |
| H250 | 18012034-3 | female | 41 | 1.76   | 3.04   |
| H251 | 18012035-3 | male   | 68 | 0.62   | 4.73   |
| H252 | 18012177-3 | female | 63 | 2.025  | -1.225 |
| H253 | 18012179-3 | female | 45 | 0.38   | 3.315  |
| H254 | 18012182-3 | female | 56 | 3.145  | 4.36   |
| H255 | 18011592-3 | female | 61 | 2.54   | 3.605  |
| H256 | 18012172-3 | male   | 50 | 1.92   | 3.595  |

|      |            |        |    |        |       |
|------|------------|--------|----|--------|-------|
| H257 | 18012170-3 | male   | 56 | 2.555  | 3.63  |
| H258 | 18012168-3 | female | 53 | 2.27   | 2.8   |
| H259 | 18012161-3 | female | 56 | 1.32   | 3.16  |
| H260 | 18012166-3 | female | 68 | 3.79   | 1.975 |
| H261 | 18012124-3 | female | 51 | 3.075  | 3.425 |
| H262 | 18012126-3 | male   | 47 | 2.725  | 2.765 |
| H263 | 18012178-3 | male   | 45 | 0.085  | 1.835 |
| H264 | 18012175-3 | male   | 67 | 1.035  | 4.02  |
| H265 | 18012169-3 | female | 58 | -0.785 | 3.925 |
| H266 | 18012173-3 | male   | 63 | 2.53   | 3.005 |
| H267 | 18012497-3 | female | 40 | -1.375 | 3.8   |
| H268 | 18012458-3 | male   | 69 | -1.045 | 2.675 |
| H269 | 18012498-3 | male   | 52 | -2.5   | 4.06  |
| H270 | 18012215-3 | male   | 47 | -1.32  | 2.885 |
| H271 | 18012201-6 | female | 49 | 0.56   | 3.215 |
| H272 | 18012219-3 | female | 40 | 1.28   | 1.93  |
| H273 | 18012202-3 | female | 52 | 0.055  | 3.22  |
| H274 | 18011763-3 | male   | 51 | 1.26   | 4.365 |
| H275 | 18012213-3 | female | 48 | 0.45   | 2.965 |
| H276 | 18012192-3 | male   | 50 | 0.585  | 3.24  |
| H277 | 18012195-3 | female | 47 | -1.245 | 2.775 |
| H278 | 18012193-3 | male   | 49 | 0.08   | 0.46  |
| H279 | 18012189-3 | male   | 49 | -1.13  | 0.575 |
| H280 | 18012210-3 | female | 45 | -0.475 | 0.17  |
| H281 | 18012211-3 | female | 52 | -0.555 | 0.275 |
| H282 | 18012203-3 | male   | 52 | -1.465 | -2.87 |

Table S3 All corresponding raw datas of miRNAs

| No   | hsa-miR-764 ( $\Delta$ CT) | hsa-miR-936 ( $\Delta$ CT) | hsa-miR-522-3p ( $\Delta$ CT) | hsa-miR-204-3p ( $\Delta$ CT) | hsa-miR-588 ( $\Delta$ CT) | hsa-miR-335-3p ( $\Delta$ CT) |
|------|----------------------------|----------------------------|-------------------------------|-------------------------------|----------------------------|-------------------------------|
| P001 | 6.96                       | 2.375                      | -0.52                         | 1.765                         | 1.59                       | 4.885                         |
| P002 | 2.76                       | 1.615                      | 2.47                          | 3.2                           | 2.61                       | 7.615                         |
| P003 | 2.275                      | 1.58                       | -0.78                         | 3.275                         | 2.545                      | 4.975                         |
| P004 | 5                          | 4.105                      | 0.465                         | 3.05                          | 3.46                       | -1.63                         |
| P005 | 3.945                      | 1.59                       | -1.96                         | 2.205                         | 2.58                       | 3.94                          |
| P006 | 3.73                       | 2.83                       | 1.46                          | 3.38                          | 2.54                       | 5.46                          |
| P007 | 3.085                      | 3.585                      | 0.875                         | 1.03                          | 2.61                       | 7.58                          |
| P008 | 2.895                      | 2.235                      | -0.355                        | 2.74                          | 2.845                      | 6.92                          |
| P009 | 6.045                      | 1.55                       | 0.77                          | 2.31                          | 2.78                       | 7.625                         |
| P010 | 7.015                      | -0.665                     | 0.27                          | 2.175                         | 2.475                      | 7.03                          |
| P011 | 4.045                      | 2.59                       | 0.945                         | 2.74                          | 2.585                      | 7.65                          |
| P012 | 4.235                      | 3.185                      | -0.35                         | 4.59                          | 0.62                       | 6.64                          |
| P013 | 6.15                       | 2.725                      | -0.525                        | 3.965                         | 2.005                      | 6.05                          |
| P014 | 3.81                       | 1.87                       | 1.275                         | 4.875                         | 2.48                       | 8.355                         |
| P015 | 6.2                        | 3.535                      | -1.1                          | 4.66                          | 2.185                      | 5.875                         |
| P016 | 4.465                      | 2.25                       | -1.805                        | 2.4                           | 2.665                      | 5.16                          |
| P017 | 3.32                       | 2.665                      | 0.215                         | 5.42                          | 2                          | 7.625                         |
| P018 | 4.55                       | 0.345                      | -1.31                         | 4.515                         | 2.535                      | 5.135                         |
| P019 | 5.405                      | 1.615                      | -0.25                         | 3.305                         | 2.16                       | 9.64                          |
| P020 | 5.445                      | 0.99                       | 0.815                         | 1.655                         | 2.115                      | 9.845                         |
| P021 | 3.56                       | 2.835                      | 0.33                          | 2.99                          | 3.085                      | 9.505                         |
| P022 | 3.64                       | 2.43                       | -1.15                         | 1.935                         | 2.365                      | 8.395                         |
| P023 | 2.695                      | 1                          | 2.405                         | 2.01                          | 2.305                      | 9.37                          |

|      |       |        |        |       |        |        |
|------|-------|--------|--------|-------|--------|--------|
| P024 | 2.45  | 1.665  | -0.19  | 0.48  | 2.69   | 9.25   |
| P025 | 5.81  | 2.575  | 2.045  | 1.355 | 2.005  | 12.21  |
| P026 | 3.945 | 1.075  | 0.67   | 0.58  | 3.405  | 10.395 |
| P027 | 5.2   | 1.81   | 2.48   | 1.09  | 2.48   | 11.74  |
| P028 | 4.27  | 0.735  | 3.34   | 1.31  | 0.61   | 11.865 |
| P029 | 6.185 | 1.795  | 2.53   | 0.325 | 2.185  | 13.005 |
| P030 | 7.24  | 1.33   | 2.7    | 4.27  | 3.245  | 12.305 |
| P031 | 6.155 | 1.525  | 2.735  | 3.345 | 2.665  | 14.045 |
| P032 | 6.36  | 1.61   | 4.49   | 3.215 | 2.82   | 13.345 |
| P033 | 6.265 | 1.39   | 1.905  | 4.175 | 2      | 10.54  |
| P034 | 6.725 | 1.205  | 2.35   | 3.875 | 2.465  | 12.22  |
| P035 | 5.52  | 2.795  | 3.595  | 3.07  | 2.535  | 11.38  |
| P036 | 5.25  | 0.985  | 1.81   | 3.83  | 2.845  | 9.67   |
| P037 | 5.005 | 2.33   | 2.445  | 4.08  | 2.16   | 11.945 |
| P038 | 6.085 | 2.525  | 2.79   | 3.48  | 3.935  | 10.645 |
| P039 | 5.52  | 2.09   | 1.26   | 2.97  | 2.115  | 11.19  |
| P040 | 6.03  | 2.39   | 2.615  | 2.875 | 2.165  | 7.885  |
| P041 | 6.275 | 0.775  | 2.225  | 1.61  | 3.085  | 11.71  |
| P042 | 5.605 | 1.82   | 1.795  | 3.415 | 2.46   | 7.44   |
| P043 | 5.34  | 1.935  | 1.775  | 2.965 | 2.365  | 0.465  |
| P044 | 5.63  | 1.545  | 2.875  | 2.9   | 2.93   | 2.35   |
| P045 | 7.24  | 2.08   | 3.49   | 2.37  | 2.305  | 1.81   |
| P046 | 6.145 | 2.52   | 3.38   | 3.2   | 2.67   | 2.79   |
| P047 | 7.825 | 2.58   | 4.55   | 1.885 | 2.69   | 9.37   |
| P048 | 6.57  | -0.495 | 3.22   | 3.045 | -1.625 | 10.38  |
| P049 | -     | -      | -1.485 | 3.44  | -      | -      |
| P050 | -     | -      | 2.925  | 4.075 | -      | -      |
| P051 | -     | -      | 3.83   | 3.105 | -      | -      |
| P052 | -     | -      | 1.065  | 3.785 | -      | -      |
| P053 | -     | -      | 4.55   | 3.985 | -      | -      |
| P054 | -     | -      | 4.185  | 4.52  | -      | -      |
| P055 | -     | -      | 1.965  | 3.58  | -      | -      |
| P056 | -     | -      | 2.24   | 1.345 | -      | -      |
| P057 | -     | -      | 2.505  | 3.46  | -      | -      |
| P058 | -     | -      | 1.555  | 3.375 | -      | -      |
| P059 | -     | -      | 0.88   | 3.59  | -      | -      |
| P060 | -     | -      | 3.075  | 2.29  | -      | -      |
| P061 | -     | -      | 1.715  | 4.985 | -      | -      |
| P062 | -     | -      | 3.49   | 3.695 | -      | -      |
| P063 | -     | -      | 2.92   | 1.965 | -      | -      |
| P064 | -     | -      | 2.585  | 2.765 | -      | -      |
| P065 | -     | -      | 3.875  | 2.86  | -      | -      |
| P066 | -     | -      | 3.23   | 3.8   | -      | -      |
| P067 | -     | -      | 2.86   | 3.07  | -      | -      |
| P068 | -     | -      | 3.41   | 3.1   | -      | -      |
| P069 | -     | -      | -0.455 | 3.825 | -      | -      |
| P070 | -     | -      | 3.105  | 2.195 | -      | -      |
| P071 | -     | -      | 4.015  | 4.54  | -      | -      |
| P072 | -     | -      | 3.195  | 2.385 | -      | -      |
| P073 | -     | -      | 4.245  | 2.16  | -      | -      |
| P074 | -     | -      | 3.655  | 2.665 | -      | -      |
| P075 | -     | -      | 3.78   | 2.28  | -      | -      |
| P076 | -     | -      | 3.505  | 1.945 | -      | -      |
| P077 | -     | -      | 3.495  | 2.955 | -      | -      |
| P078 | -     | -      | 3.25   | 2.86  | -      | -      |
| P079 | -     | -      | 4.76   | 3.38  | -      | -      |
| P080 | -     | -      | 2.77   | 3.025 | -      | -      |
| P081 | -     | -      | 2.31   | 4.01  | -      | -      |
| P082 | -     | -      | 3.56   | 1.74  | -      | -      |



|      |   |   |       |       |   |   |
|------|---|---|-------|-------|---|---|
| P083 | - | - | 3.05  | 1.765 | - | - |
| P084 | - | - | 1.715 | 3.2   | - | - |
| P085 | - | - | 0.455 | 3.275 | - | - |
| P086 | - | - | 4.115 | 3.05  | - | - |
| P087 | - | - | 1.615 | 2.205 | - | - |
| P088 | - | - | 1.91  | 3.38  | - | - |
| P089 | - | - | 0.99  | 1.03  | - | - |
| P090 | - | - | 2.9   | 2.74  | - | - |
| P091 | - | - | 2.79  | 2.31  | - | - |
| P092 | - | - | 3.115 | 2.175 | - | - |
| P093 | - | - | 3.92  | 2.74  | - | - |
| P094 | - | - | 3.935 | 4.59  | - | - |
| P095 | - | - | 4.425 | 3.965 | - | - |
| P096 | - | - | 4.555 | 4.875 | - | - |
| P097 | - | - | 3.625 | 4.66  | - | - |
| P098 | - | - | 3.26  | 2.4   | - | - |
| P099 | - | - | 4.545 | 5.42  | - | - |
| P100 | - | - | 6.02  | 4.515 | - | - |
| P101 | - | - | 4.23  | 3.305 | - | - |
| P102 | - | - | 3.765 | 6.88  | - | - |
| P103 | - | - | 4.635 | 6.345 | - | - |
| P104 | - | - | 3.97  | 5.12  | - | - |
| P105 | - | - | 4.52  | 4.82  | - | - |
| P106 | - | - | 4.39  | 3.34  | - | - |
| P107 | - | - | 5.08  | 4.2   | - | - |
| P108 | - | - | 5.795 | 3.77  | - | - |
| P109 | - | - | 4.23  | 4.505 | - | - |
| P110 | - | - | 5.84  | 4.52  | - | - |
| P111 | - | - | 4.795 | 4.555 | - | - |
| P112 | - | - | 5.335 | 3.365 | - | - |
| P113 | - | - | 5.225 | 4.66  | - | - |
| P114 | - | - | 5.15  | 3.215 | - | - |
| P115 | - | - | 1.535 | 4.175 | - | - |
| P116 | - | - | 2.885 | 3.875 | - | - |
| P117 | - | - | 2.355 | 3.07  | - | - |
| P118 | - | - | 2.635 | 3.83  | - | - |
| P119 | - | - | 2.975 | 4.08  | - | - |
| P120 | - | - | 2.93  | 3.48  | - | - |
| P121 | - | - | -     | -     | - | - |
| P122 | - | - | -     | -     | - | - |
| P123 | - | - | -     | -     | - | - |
| P124 | - | - | -     | -     | - | - |
| P125 | - | - | -     | -     | - | - |
| P126 | - | - | -     | -     | - | - |
| P127 | - | - | -     | -     | - | - |
| P128 | - | - | -     | -     | - | - |
| P129 | - | - | -     | -     | - | - |
| P130 | - | - | -     | -     | - | - |
| P131 | - | - | -     | -     | - | - |
| P132 | - | - | -     | -     | - | - |
| P133 | - | - | -     | -     | - | - |
| P134 | - | - | -     | -     | - | - |
| P135 | - | - | -     | -     | - | - |
| P136 | - | - | -     | -     | - | - |
| P137 | - | - | -     | -     | - | - |
| P138 | - | - | -     | -     | - | - |
| P139 | - | - | -     | -     | - | - |
| P140 | - | - | -     | -     | - | - |
| P141 | - | - | -     | -     | - | - |

|      |   |   |   |   |   |   |
|------|---|---|---|---|---|---|
| P142 | - | - | - | - | - | - |
| P143 | - | - | - | - | - | - |
| P144 | - | - | - | - | - | - |
| P145 | - | - | - | - | - | - |
| P146 | - | - | - | - | - | - |
| P147 | - | - | - | - | - | - |
| P148 | - | - | - | - | - | - |
| P149 | - | - | - | - | - | - |
| P150 | - | - | - | - | - | - |
| P151 | - | - | - | - | - | - |
| P152 | - | - | - | - | - | - |
| P153 | - | - | - | - | - | - |
| P154 | - | - | - | - | - | - |
| P155 | - | - | - | - | - | - |
| P156 | - | - | - | - | - | - |
| P157 | - | - | - | - | - | - |
| P158 | - | - | - | - | - | - |
| P159 | - | - | - | - | - | - |
| P160 | - | - | - | - | - | - |
| P161 | - | - | - | - | - | - |
| P162 | - | - | - | - | - | - |
| P163 | - | - | - | - | - | - |
| P164 | - | - | - | - | - | - |
| P165 | - | - | - | - | - | - |
| P166 | - | - | - | - | - | - |
| P167 | - | - | - | - | - | - |
| P168 | - | - | - | - | - | - |
| P169 | - | - | - | - | - | - |
| P170 | - | - | - | - | - | - |
| P171 | - | - | - | - | - | - |
| P172 | - | - | - | - | - | - |
| P173 | - | - | - | - | - | - |
| P174 | - | - | - | - | - | - |
| P175 | - | - | - | - | - | - |
| P176 | - | - | - | - | - | - |
| P177 | - | - | - | - | - | - |
| P178 | - | - | - | - | - | - |
| P179 | - | - | - | - | - | - |
| P180 | - | - | - | - | - | - |
| P181 | - | - | - | - | - | - |
| P182 | - | - | - | - | - | - |
| P183 | - | - | - | - | - | - |
| P184 | - | - | - | - | - | - |
| P185 | - | - | - | - | - | - |
| P186 | - | - | - | - | - | - |
| P187 | - | - | - | - | - | - |
| P188 | - | - | - | - | - | - |
| P189 | - | - | - | - | - | - |
| P190 | - | - | - | - | - | - |
| P191 | - | - | - | - | - | - |
| P192 | - | - | - | - | - | - |
| P193 | - | - | - | - | - | - |
| P194 | - | - | - | - | - | - |
| P195 | - | - | - | - | - | - |
| P196 | - | - | - | - | - | - |
| P197 | - | - | - | - | - | - |
| P198 | - | - | - | - | - | - |
| P199 | - | - | - | - | - | - |
| P200 | - | - | - | - | - | - |

|      |   |   |   |   |   |   |
|------|---|---|---|---|---|---|
| P201 | - | - | - | - | - | - |
| P202 | - | - | - | - | - | - |
| P203 | - | - | - | - | - | - |
| P204 | - | - | - | - | - | - |
| P205 | - | - | - | - | - | - |
| P206 | - | - | - | - | - | - |
| P207 | - | - | - | - | - | - |
| P208 | - | - | - | - | - | - |
| P209 | - | - | - | - | - | - |
| P210 | - | - | - | - | - | - |
| P211 | - | - | - | - | - | - |
| P212 | - | - | - | - | - | - |
| P213 | - | - | - | - | - | - |
| P214 | - | - | - | - | - | - |
| P215 | - | - | - | - | - | - |
| P216 | - | - | - | - | - | - |
| P217 | - | - | - | - | - | - |
| P218 | - | - | - | - | - | - |
| P219 | - | - | - | - | - | - |
| P220 | - | - | - | - | - | - |
| P221 | - | - | - | - | - | - |
| P222 | - | - | - | - | - | - |
| P223 | - | - | - | - | - | - |
| P224 | - | - | - | - | - | - |
| P225 | - | - | - | - | - | - |
| P226 | - | - | - | - | - | - |
| P227 | - | - | - | - | - | - |
| P228 | - | - | - | - | - | - |
| P229 | - | - | - | - | - | - |
| P230 | - | - | - | - | - | - |
| P231 | - | - | - | - | - | - |
| P232 | - | - | - | - | - | - |
| P233 | - | - | - | - | - | - |
| P234 | - | - | - | - | - | - |
| P235 | - | - | - | - | - | - |
| P236 | - | - | - | - | - | - |
| P237 | - | - | - | - | - | - |
| P238 | - | - | - | - | - | - |
| P239 | - | - | - | - | - | - |
| P240 | - | - | - | - | - | - |
| P241 | - | - | - | - | - | - |
| P242 | - | - | - | - | - | - |
| P243 | - | - | - | - | - | - |
| P244 | - | - | - | - | - | - |
| P245 | - | - | - | - | - | - |
| P246 | - | - | - | - | - | - |
| P247 | - | - | - | - | - | - |
| P248 | - | - | - | - | - | - |
| P249 | - | - | - | - | - | - |
| P250 | - | - | - | - | - | - |
| P251 | - | - | - | - | - | - |
| P252 | - | - | - | - | - | - |
| P253 | - | - | - | - | - | - |
| P254 | - | - | - | - | - | - |
| P255 | - | - | - | - | - | - |
| P256 | - | - | - | - | - | - |
| P257 | - | - | - | - | - | - |
| P258 | - | - | - | - | - | - |
| P259 | - | - | - | - | - | - |

|      |       |        |       |       |        |        |
|------|-------|--------|-------|-------|--------|--------|
| P260 | -     | -      | -     | -     | -      | -      |
| P261 | -     | -      | -     | -     | -      | -      |
| P262 | -     | -      | -     | -     | -      | -      |
| P263 | -     | -      | -     | -     | -      | -      |
| P264 | -     | -      | -     | -     | -      | -      |
| P265 | -     | -      | -     | -     | -      | -      |
| P266 | -     | -      | -     | -     | -      | -      |
| P267 | -     | -      | -     | -     | -      | -      |
| P268 | -     | -      | -     | -     | -      | -      |
| P269 | -     | -      | -     | -     | -      | -      |
| P270 | -     | -      | -     | -     | -      | -      |
| P271 | -     | -      | -     | -     | -      | -      |
| P272 | -     | -      | -     | -     | -      | -      |
| P273 | -     | -      | -     | -     | -      | -      |
| P274 | -     | -      | -     | -     | -      | -      |
| P275 | -     | -      | -     | -     | -      | -      |
| P276 | -     | -      | -     | -     | -      | -      |
| H001 | 2.93  | 2.52   | 4.23  | 2.92  | 3.765  | 8.305  |
| H002 | 3.795 | -1.105 | 2.285 | 2.755 | 2.285  | 6.285  |
| H003 | 2.62  | -2.15  | 4.07  | 2.95  | 1.345  | 7.69   |
| H004 | 3.825 | 1.435  | 3.965 | 2.845 | 2.535  | 7.805  |
| H005 | 1.13  | 0.36   | 4.125 | 2.825 | -3.475 | 7.73   |
| H006 | 2.955 | 0      | 0.47  | 3.22  | 1.24   | 5.86   |
| H007 | 1.92  | -0.665 | 3.845 | 2.51  | 2.185  | 10.055 |
| H008 | 1.62  | -0.81  | 2.595 | 1.985 | 2.48   | 10.15  |
| H009 | 2.035 | 2.1    | 4.82  | 3.835 | 2.145  | 10.81  |
| H010 | 1.465 | 3.05   | 4.435 | 2.925 | 1.825  | 10.48  |
| H011 | 8.615 | 0.625  | 3.31  | 2.575 | -0.34  | 9.505  |
| H012 | 6.86  | 0.31   | 3.425 | 2.43  | 3.23   | 9.66   |
| H013 | 6.395 | 1.655  | 2.51  | 3.035 | 1.99   | 8.99   |
| H014 | 6.645 | -0.085 | 3.425 | 2.54  | 1.265  | 9.54   |
| H015 | 6.98  | 2.095  | 3.06  | 3.075 | 1.105  | 9.59   |
| H016 | 5.86  | 0.48   | 2.34  | 2.485 | 3.165  | 9.195  |
| H017 | 5.565 | -1.145 | 2.275 | 3.24  | 2.6    | 9.145  |
| H018 | 5.365 | -0.115 | 3.825 | 2.955 | 2.27   | 10.215 |
| H019 | 7.775 | 0.99   | 1.83  | 3.435 | 2.4    | 12.835 |
| H020 | 5.655 | 1.14   | 4.565 | 3.12  | 2.885  | 12.205 |
| H021 | 5.25  | -0.59  | 1.89  | 3.12  | 2.285  | 9.605  |
| H022 | 7.305 | -0.6   | 1.19  | 2.29  | 1.6    | 8.84   |
| H023 | 6.155 | -1.38  | 2.45  | 4     | 3.555  | 9.53   |
| H024 | 6.545 | -1.41  | 1.64  | 3.5   | 2.99   | 9.335  |
| H025 | 6.03  | 0.155  | 1.49  | 3.97  | 1.99   | 9.45   |
| H026 | 4.96  | 0.545  | 2.555 | 5.32  | 1.395  | 10.775 |
| H027 | 6.695 | 1.895  | 2.04  | 3.71  | 1.265  | 9.285  |
| H028 | 5.995 | 1.325  | 0.24  | 4.065 | 2.48   | 10.975 |
| H029 | 5.375 | 2.665  | 2.3   | 4.8   | 1.105  | 11.18  |
| H030 | 4.96  | 3.175  | 2.92  | 4.76  | 2.085  | 11.795 |
| H031 | 5.875 | 2.525  | 2.21  | 4.79  | 3.165  | 7.045  |
| H032 | 7.015 | 1.785  | 1.775 | 4.89  | 2.255  | 7.715  |
| H033 | 5.875 | 3.115  | 3.22  | 4.285 | 2.6    | 2.775  |
| H034 | 5.655 | 3.55   | 2.775 | 3.925 | 2.325  | 12.53  |
| H035 | 5.87  | 2.53   | 3.05  | 4.585 | 2.27   | 11.045 |
| H036 | 6.615 | 1.985  | 2.23  | 2.275 | 3.02   | 8.125  |
| H037 | 6.24  | 2.165  | 3.445 | 4.545 | 2.4    | 10.935 |
| H038 | 6.215 | 2.65   | 1.85  | 3.935 | 2.62   | 10.685 |
| H039 | 7.74  | 2.635  | 2.635 | 4.145 | 2.885  | 7.575  |
| H040 | 3.945 | 2.58   | -0.22 | 3.815 | 2.605  | 6.99   |
| H041 | 4.445 | 2.155  | 2.38  | 6     | 2.285  | 10.865 |
| H042 | 5.7   | 2.875  | 3.095 | 2.18  | 2.765  | 12.22  |

|      |       |       |        |       |       |       |
|------|-------|-------|--------|-------|-------|-------|
| H043 | 5.22  | 2.26  | 0.615  | 4.53  | 1.6   | 3.965 |
| H044 | 4.97  | 2.685 | 2.98   | 5.23  | 3.54  | 8.775 |
| H045 | 5.58  | 3.28  | 2.99   | 4.835 | 3.555 | 2.23  |
| H046 | 3.79  | 2.625 | 2.625  | 4.275 | 3.75  | 1.85  |
| H047 | 7.075 | 3.43  | -1.995 | 4.165 | 2.99  | 9.53  |
| H048 | 4.59  | 3.385 | 0.395  | 3.39  | 3.055 | 4.82  |
| H049 | -     | -     | 2.275  | 4.97  | -     | -     |
| H050 | -     | -     | 1.55   | 4.3   | -     | -     |
| H051 | -     | -     | 2.785  | 5.03  | -     | -     |
| H052 | -     | -     | 2.73   | 4.54  | -     | -     |
| H053 | -     | -     | 3.35   | 3.12  | -     | -     |
| H054 | -     | -     | 2.09   | 5.64  | -     | -     |
| H055 | -     | -     | 1.965  | 5.895 | -     | -     |
| H056 | -     | -     | 4.065  | 5.02  | -     | -     |
| H057 | -     | -     | 2.515  | 5.455 | -     | -     |
| H058 | -     | -     | 3.05   | 4.065 | -     | -     |
| H059 | -     | -     | 2.57   | 5.965 | -     | -     |
| H060 | -     | -     | 3.195  | 3.805 | -     | -     |
| H061 | -     | -     | 0.85   | 4.375 | -     | -     |
| H062 | -     | -     | 2.615  | 4.02  | -     | -     |
| H063 | -     | -     | 1.325  | 3.705 | -     | -     |
| H064 | -     | -     | 1.98   | 5.77  | -     | -     |
| H065 | -     | -     | 1.33   | 4.44  | -     | -     |
| H066 | -     | -     | 1.995  | 4.845 | -     | -     |
| H067 | -     | -     | 3.285  | 3.88  | -     | -     |
| H068 | -     | -     | 0.645  | 3.73  | -     | -     |
| H069 | -     | -     | 0.39   | 2.99  | -     | -     |
| H070 | -     | -     | 2.03   | 3.745 | -     | -     |
| H071 | -     | -     | 2.48   | 3.66  | -     | -     |
| H072 | -     | -     | 2.065  | 0.58  | -     | -     |
| H073 | -     | -     | 4.155  | 2.97  | -     | -     |
| H074 | -     | -     | 3.065  | 2.875 | -     | -     |
| H075 | -     | -     | 2.325  | 1.61  | -     | -     |
| H076 | -     | -     | 2.95   | 3.415 | -     | -     |
| H077 | -     | -     | 2.52   | 2.965 | -     | -     |
| H078 | -     | -     | 2.99   | 2.9   | -     | -     |
| H079 | -     | -     | 3.635  | 2.37  | -     | -     |
| H080 | -     | -     | 3.06   | 3.2   | -     | -     |
| H081 | -     | -     | 0.21   | 1.885 | -     | -     |
| H082 | -     | -     | -0.055 | 3.045 | -     | -     |
| H083 | -     | -     | 0.5    | 2.67  | -     | -     |
| H084 | -     | -     | 3.16   | 2.165 | -     | -     |
| H085 | -     | -     | 0.275  | 1.83  | -     | -     |
| H086 | -     | -     | 0.155  | 3.97  | -     | -     |
| H087 | -     | -     | -1.065 | 4.27  | -     | -     |
| H088 | -     | -     | 0.805  | 3.19  | -     | -     |
| H089 | -     | -     | 0.36   | 2.575 | -     | -     |
| H090 | -     | -     | -0.375 | 2.305 | -     | -     |
| H091 | -     | -     | -0.08  | 3.885 | -     | -     |
| H092 | -     | -     | 0.975  | 3.32  | -     | -     |
| H093 | -     | -     | -0.15  | 1.525 | -     | -     |
| H094 | -     | -     | 0.32   | 1.655 | -     | -     |
| H095 | -     | -     | -2.13  | 2.99  | -     | -     |
| H096 | -     | -     | 0.09   | 1.935 | -     | -     |
| H097 | -     | -     | -1.69  | 2.01  | -     | -     |
| H098 | -     | -     | -1.035 | 0.48  | -     | -     |
| H099 | -     | -     | -0.9   | 1.355 | -     | -     |
| H100 | -     | -     | -1.51  | 0.58  | -     | -     |
| H101 | -     | -     | 2.245  | 1.09  | -     | -     |

|      |   |   |       |       |   |   |
|------|---|---|-------|-------|---|---|
| H102 | - | - | 4.445 | 1.31  | - | - |
| H103 | - | - | 3.685 | 0.325 | - | - |
| H104 | - | - | 3.595 | 4.27  | - | - |
| H105 | - | - | 3.565 | 3.345 | - | - |
| H106 | - | - | 4     | 5.535 | - | - |
| H107 | - | - | 3.26  | 5.04  | - | - |
| H108 | - | - | 4.4   | 5.09  | - | - |
| H109 | - | - | 3.785 | 4.96  | - | - |
| H110 | - | - | 2.975 | 4.62  | - | - |
| H111 | - | - | 2.485 | 2.71  | - | - |
| H112 | - | - | 3.345 | 5.01  | - | - |
| H113 | - | - | 4.61  | 5.305 | - | - |
| H114 | - | - | 5.525 | 3.86  | - | - |
| H115 | - | - | 3.345 | 4.685 | - | - |
| H116 | - | - | 4.61  | 2.81  | - | - |
| H117 | - | - | 5.525 | 3.18  | - | - |
| H118 | - | - | 3.26  | 2.06  | - | - |
| H119 | - | - | 4.545 | 4.015 | - | - |
| H120 | - | - | 6.02  | 3.385 | - | - |
| H121 | - | - | -     | -     | - | - |
| H122 | - | - | -     | -     | - | - |
| H123 | - | - | -     | -     | - | - |
| H124 | - | - | -     | -     | - | - |
| H125 | - | - | -     | -     | - | - |
| H126 | - | - | -     | -     | - | - |
| H127 | - | - | -     | -     | - | - |
| H128 | - | - | -     | -     | - | - |
| H129 | - | - | -     | -     | - | - |
| H130 | - | - | -     | -     | - | - |
| H131 | - | - | -     | -     | - | - |
| H132 | - | - | -     | -     | - | - |
| H133 | - | - | -     | -     | - | - |
| H134 | - | - | -     | -     | - | - |
| H135 | - | - | -     | -     | - | - |
| H136 | - | - | -     | -     | - | - |
| H137 | - | - | -     | -     | - | - |
| H138 | - | - | -     | -     | - | - |
| H139 | - | - | -     | -     | - | - |
| H140 | - | - | -     | -     | - | - |
| H141 | - | - | -     | -     | - | - |
| H142 | - | - | -     | -     | - | - |
| H143 | - | - | -     | -     | - | - |
| H144 | - | - | -     | -     | - | - |
| H145 | - | - | -     | -     | - | - |
| H146 | - | - | -     | -     | - | - |
| H147 | - | - | -     | -     | - | - |
| H148 | - | - | -     | -     | - | - |
| H149 | - | - | -     | -     | - | - |
| H150 | - | - | -     | -     | - | - |
| H151 | - | - | -     | -     | - | - |
| H152 | - | - | -     | -     | - | - |
| H153 | - | - | -     | -     | - | - |
| H154 | - | - | -     | -     | - | - |
| H155 | - | - | -     | -     | - | - |
| H156 | - | - | -     | -     | - | - |
| H157 | - | - | -     | -     | - | - |
| H158 | - | - | -     | -     | - | - |
| H159 | - | - | -     | -     | - | - |
| H160 | - | - | -     | -     | - | - |

|      |   |   |   |   |   |   |
|------|---|---|---|---|---|---|
| H161 | - | - | - | - | - | - |
| H162 | - | - | - | - | - | - |
| H163 | - | - | - | - | - | - |
| H164 | - | - | - | - | - | - |
| H165 | - | - | - | - | - | - |
| H166 | - | - | - | - | - | - |
| H167 | - | - | - | - | - | - |
| H168 | - | - | - | - | - | - |
| H169 | - | - | - | - | - | - |
| H170 | - | - | - | - | - | - |
| H171 | - | - | - | - | - | - |
| H172 | - | - | - | - | - | - |
| H173 | - | - | - | - | - | - |
| H174 | - | - | - | - | - | - |
| H175 | - | - | - | - | - | - |
| H176 | - | - | - | - | - | - |
| H177 | - | - | - | - | - | - |
| H178 | - | - | - | - | - | - |
| H179 | - | - | - | - | - | - |
| H180 | - | - | - | - | - | - |
| H181 | - | - | - | - | - | - |
| H182 | - | - | - | - | - | - |
| H183 | - | - | - | - | - | - |
| H184 | - | - | - | - | - | - |
| H185 | - | - | - | - | - | - |
| H186 | - | - | - | - | - | - |
| H187 | - | - | - | - | - | - |
| H188 | - | - | - | - | - | - |
| H189 | - | - | - | - | - | - |
| H190 | - | - | - | - | - | - |
| H191 | - | - | - | - | - | - |
| H192 | - | - | - | - | - | - |
| H193 | - | - | - | - | - | - |
| H194 | - | - | - | - | - | - |
| H195 | - | - | - | - | - | - |
| H196 | - | - | - | - | - | - |
| H197 | - | - | - | - | - | - |
| H198 | - | - | - | - | - | - |
| H199 | - | - | - | - | - | - |
| H200 | - | - | - | - | - | - |
| H201 | - | - | - | - | - | - |
| H202 | - | - | - | - | - | - |
| H203 | - | - | - | - | - | - |
| H204 | - | - | - | - | - | - |
| H205 | - | - | - | - | - | - |
| H206 | - | - | - | - | - | - |
| H207 | - | - | - | - | - | - |
| H208 | - | - | - | - | - | - |
| H209 | - | - | - | - | - | - |
| H210 | - | - | - | - | - | - |
| H211 | - | - | - | - | - | - |
| H212 | - | - | - | - | - | - |
| H213 | - | - | - | - | - | - |
| H214 | - | - | - | - | - | - |
| H215 | - | - | - | - | - | - |
| H216 | - | - | - | - | - | - |
| H217 | - | - | - | - | - | - |
| H218 | - | - | - | - | - | - |
| H219 | - | - | - | - | - | - |

|      |   |   |   |   |   |   |
|------|---|---|---|---|---|---|
| H220 | - | - | - | - | - | - |
| H221 | - | - | - | - | - | - |
| H222 | - | - | - | - | - | - |
| H223 | - | - | - | - | - | - |
| H224 | - | - | - | - | - | - |
| H225 | - | - | - | - | - | - |
| H226 | - | - | - | - | - | - |
| H227 | - | - | - | - | - | - |
| H228 | - | - | - | - | - | - |
| H229 | - | - | - | - | - | - |
| H230 | - | - | - | - | - | - |
| H231 | - | - | - | - | - | - |
| H232 | - | - | - | - | - | - |
| H233 | - | - | - | - | - | - |
| H234 | - | - | - | - | - | - |
| H235 | - | - | - | - | - | - |
| H236 | - | - | - | - | - | - |
| H237 | - | - | - | - | - | - |
| H238 | - | - | - | - | - | - |
| H239 | - | - | - | - | - | - |
| H240 | - | - | - | - | - | - |
| H241 | - | - | - | - | - | - |
| H242 | - | - | - | - | - | - |
| H243 | - | - | - | - | - | - |
| H244 | - | - | - | - | - | - |
| H245 | - | - | - | - | - | - |
| H246 | - | - | - | - | - | - |
| H247 | - | - | - | - | - | - |
| H248 | - | - | - | - | - | - |
| H249 | - | - | - | - | - | - |
| H250 | - | - | - | - | - | - |
| H251 | - | - | - | - | - | - |
| H252 | - | - | - | - | - | - |
| H253 | - | - | - | - | - | - |
| H254 | - | - | - | - | - | - |
| H255 | - | - | - | - | - | - |
| H256 | - | - | - | - | - | - |
| H257 | - | - | - | - | - | - |
| H258 | - | - | - | - | - | - |
| H259 | - | - | - | - | - | - |
| H260 | - | - | - | - | - | - |
| H261 | - | - | - | - | - | - |
| H262 | - | - | - | - | - | - |
| H263 | - | - | - | - | - | - |
| H264 | - | - | - | - | - | - |
| H265 | - | - | - | - | - | - |
| H266 | - | - | - | - | - | - |
| H267 | - | - | - | - | - | - |
| H268 | - | - | - | - | - | - |
| H269 | - | - | - | - | - | - |
| H270 | - | - | - | - | - | - |
| H271 | - | - | - | - | - | - |
| H272 | - | - | - | - | - | - |
| H273 | - | - | - | - | - | - |
| H274 | - | - | - | - | - | - |
| H275 | - | - | - | - | - | - |
| H276 | - | - | - | - | - | - |
| H277 | - | - | - | - | - | - |
| H278 | - | - | - | - | - | - |



|      |   |   |   |   |   |   |
|------|---|---|---|---|---|---|
| H279 | - | - | - | - | - | - |
| H280 | - | - | - | - | - | - |
| H281 | - | - | - | - | - | - |
| H282 | - | - | - | - | - | - |

| No   | hsa-miR-320a ( $\Delta$ CT) | hsa-miR-126-5p ( $\Delta$ CT) | hsa-miR-491-3p ( $\Delta$ CT) | hsa-miR-20b-5p ( $\Delta$ CT) | hsa-miR-502-3p ( $\Delta$ CT) | hsa-miR-3187-5p ( $\Delta$ CT) |
|------|-----------------------------|-------------------------------|-------------------------------|-------------------------------|-------------------------------|--------------------------------|
| P001 | 0.375                       | 6.11                          | 2.39                          | 2.485                         | 3.615                         | 1.68                           |
| P002 | 0.74                        | 4.8                           | 2.81                          | 3.865                         | 0.335                         | 2.095                          |
| P003 | 1.1                         | 4.7                           | 2.44                          | 3.405                         | 1.56                          | 1.58                           |
| P004 | 1.36                        | 6.57                          | 2.3                           | 4.115                         | 3.88                          | 2.475                          |
| P005 | 1.525                       | 5.515                         | 3.02                          | 5.235                         | 2.19                          | 3.635                          |
| P006 | 2.665                       | 6.47                          | 4.52                          | 3.54                          | 2.885                         | 2.195                          |
| P007 | 2.075                       | 7.435                         | 3.33                          | 3.95                          | 1.73                          | 3.195                          |
| P008 | 1.54                        | 5.81                          | 3.63                          | 3.985                         | 1.685                         | 3.075                          |
| P009 | 2.05                        | 4.69                          | 2.72                          | 2.575                         | 3.88                          | 1.695                          |
| P010 | 2.04                        | 3.075                         | 3.85                          | 4.635                         | 5.725                         | 3.555                          |
| P011 | 1.985                       | 5.55                          | 3.35                          | 4.95                          | 2.975                         | 3.08                           |
| P012 | 1.855                       | 5.335                         | 3.76                          | 4.385                         | 3.235                         | 2.285                          |
| P013 | 1.71                        | 5.87                          | 4.53                          | 4.525                         | 5.76                          | 1.86                           |
| P014 | 2.14                        | 4.73                          | 5.02                          | 5.51                          | 4.135                         | 3.8                            |
| P015 | 1.435                       | 5.92                          | 3.94                          | 3.415                         | 5.33                          | 1.59                           |
| P016 | 1.485                       | 5.025                         | 4.02                          | 3.535                         | 1.925                         | 3.38                           |
| P017 | 1.465                       | 5.91                          | 2.99                          | 4.715                         | 1.265                         | 2.565                          |
| P018 | 1.3                         | 3.99                          | 4.77                          | 3.98                          | 3.95                          | 2.215                          |
| P019 | 1.5                         | 4.78                          | 2.74                          | 4.94                          | 4.49                          | 2.38                           |
| P020 | 1.44                        | 4.325                         | 2.8                           | 4.9                           | 4.675                         | 2.625                          |
| P021 | 1.86                        | 5.605                         | 3.11                          | 4.97                          | 3.06                          | 3.36                           |
| P022 | 1.92                        | 5.61                          | 3.37                          | 5.86                          | 3.21                          | 3.23                           |
| P023 | 2.925                       | 4.535                         | 3.75                          | 5.17                          | 1.845                         | 3.205                          |
| P024 | 2.79                        | 4.47                          | 3.93                          | 3.545                         | 1.37                          | 2.18                           |
| P025 | 2.765                       | 6.93                          | 5.06                          | 1.525                         | -1.485                        | 3.27                           |
| P026 | 1.915                       | 4.86                          | 2.75                          | 1.76                          | 1.635                         | 1.805                          |
| P027 | 2.3                         | 4.895                         | 8.21                          | 4.29                          | 2.135                         | 3.01                           |
| P028 | 2.975                       | 5.165                         | 7.13                          | 3.13                          | 2.31                          | 4.765                          |
| P029 | 2.525                       | 5.355                         | 5.29                          | 3.4                           | 2.3                           | 3.895                          |
| P030 | 2.63                        | 4.89                          | 4.99                          | 2.615                         | 3.08                          | 4.455                          |
| P031 | 2.95                        | 5.565                         | 3.8                           | 2.255                         | 2.365                         | 4.44                           |
| P032 | 3.17                        | 5.51                          | 4.31                          | 4.33                          | 1.695                         | 4.28                           |
| P033 | 2.115                       | 4.89                          | 4.16                          | 5.645                         | 3.11                          | 3.155                          |
| P034 | 1.935                       | 5.215                         | 3.91                          | 3.96                          | 3.145                         | 3.34                           |
| P035 | 2.36                        | 7.825                         | 1                             | 3.97                          | 2.87                          | 4.355                          |
| P036 | 2.835                       | 4.275                         | 2.87                          | 5.095                         | 2.315                         | 4.125                          |
| P037 | 2.505                       | 5.675                         | 5.82                          | 2.625                         | 2.995                         | 2.885                          |
| P038 | 2.525                       | 5.63                          | 4.26                          | 4.53                          | 2.835                         | 3.95                           |
| P039 | 2.935                       | 6.155                         | 3.94                          | 2.885                         | 2.25                          | 3.705                          |
| P040 | 2.17                        | 5.395                         | 4.42                          | 2.185                         | 2.02                          | 4.295                          |
| P041 | 2.22                        | 5.675                         | 3.5                           | 2.65                          | 2.155                         | 3.07                           |
| P042 | -0.915                      | 5.24                          | 2.64                          | 3.205                         | 2.28                          | 3.535                          |
| P043 | 1.555                       | 5.32                          | 3.97                          | 3.745                         | 2.33                          | 4.42                           |
| P044 | 2.875                       | 6.205                         | 4.28                          | 2.3                           | 2.415                         | 2.515                          |
| P045 | 2.98                        | 5.63                          | 3.44                          | 2.38                          | 2.69                          | 3.945                          |
| P046 | 0.21                        | 5.82                          | 4.02                          | 2.015                         | 2.705                         | 3.33                           |
| P047 | 1.43                        | 5.72                          | 2.73                          | 2.12                          | 3.16                          | 4.42                           |
| P048 | 0.545                       | 3.625                         | 2.43                          | 1.91                          | 3.43                          | 0.925                          |

|      |   |   |   |       |   |       |
|------|---|---|---|-------|---|-------|
| P049 | - | - | - | 2.23  | - | 2.09  |
| P050 | - | - | - | 3.36  | - | 2.665 |
| P051 | - | - | - | 3.495 | - | 2.69  |
| P052 | - | - | - | 3.875 | - | 2.9   |
| P053 | - | - | - | 4.145 | - | 2.935 |
| P054 | - | - | - | 2.975 | - | 2.165 |
| P055 | - | - | - | 2.41  | - | 1.715 |
| P056 | - | - | - | 4.44  | - | 3.15  |
| P057 | - | - | - | 4.64  | - | 3.825 |
| P058 | - | - | - | 3.045 | - | 3.68  |
| P059 | - | - | - | 3.435 | - | 2.815 |
| P060 | - | - | - | 4.33  | - | 3.535 |
| P061 | - | - | - | 3.72  | - | 2.555 |
| P062 | - | - | - | 4.29  | - | 3.01  |
| P063 | - | - | - | 2.965 | - | 2.545 |
| P064 | - | - | - | 3.2   | - | 2.865 |
| P065 | - | - | - | 3     | - | 3.28  |
| P066 | - | - | - | 3.695 | - | 2.835 |
| P067 | - | - | - | 3.265 | - | 3.425 |
| P068 | - | - | - | 3.21  | - | 2.505 |
| P069 | - | - | - | 3.98  | - | 3.455 |
| P070 | - | - | - | 2.43  | - | 3.09  |
| P071 | - | - | - | 4.105 | - | 3.635 |
| P072 | - | - | - | 3.59  | - | 2.81  |
| P073 | - | - | - | 4.72  | - | 3.79  |
| P074 | - | - | - | 4.66  | - | 3     |
| P075 | - | - | - | 5.94  | - | 4.39  |
| P076 | - | - | - | 3.625 | - | 0.585 |
| P077 | - | - | - | 4.47  | - | 3.52  |
| P078 | - | - | - | 5.11  | - | 4.12  |
| P079 | - | - | - | 5.695 | - | 4.53  |
| P080 | - | - | - | 4.72  | - | 4.825 |
| P081 | - | - | - | 3.225 | - | 2.8   |
| P082 | - | - | - | 4.895 | - | 3.535 |
| P083 | - | - | - | 6.295 | - | 5.255 |
| P084 | - | - | - | 4.85  | - | 3.565 |
| P085 | - | - | - | 5.26  | - | 4.43  |
| P086 | - | - | - | 4.21  | - | 3.955 |
| P087 | - | - | - | 4.255 | - | 3.67  |
| P088 | - | - | - | 4.77  | - | 3.73  |
| P089 | - | - | - | 3.03  | - | 2.55  |
| P090 | - | - | - | 1.855 | - | 4.18  |
| P091 | - | - | - | 4.905 | - | 3.775 |
| P092 | - | - | - | 3.94  | - | 3.235 |
| P093 | - | - | - | 3.25  | - | 0.65  |
| P094 | - | - | - | 4.315 | - | 4.295 |
| P095 | - | - | - | 4.035 | - | 2.36  |
| P096 | - | - | - | 4.125 | - | 2.625 |
| P097 | - | - | - | 5.145 | - | 3.225 |
| P098 | - | - | - | 5.01  | - | 2.575 |
| P099 | - | - | - | 5.18  | - | 3.155 |
| P100 | - | - | - | 5.605 | - | 4.015 |
| P101 | - | - | - | 5.035 | - | 3.455 |
| P102 | - | - | - | 4.76  | - | 2.675 |
| P103 | - | - | - | 4.25  | - | 2.79  |
| P104 | - | - | - | 4.45  | - | 2.93  |
| P105 | - | - | - | 4.54  | - | 2.495 |
| P106 | - | - | - | 3.84  | - | 2.875 |
| P107 | - | - | - | 5.65  | - | 3.915 |

|      |   |   |   |       |   |       |
|------|---|---|---|-------|---|-------|
| P108 | - | - | - | 6.065 | - | 4.71  |
| P109 | - | - | - | 4.505 | - | 2.43  |
| P110 | - | - | - | 4.915 | - | 3.13  |
| P111 | - | - | - | 6.155 | - | 3.345 |
| P112 | - | - | - | 4.465 | - | 2.33  |
| P113 | - | - | - | 3.515 | - | 1.72  |
| P114 | - | - | - | 5.185 | - | 3.15  |
| P115 | - | - | - | 5.2   | - | 3.37  |
| P116 | - | - | - | 5.085 | - | 3.225 |
| P117 | - | - | - | 3.815 | - | 1.32  |
| P118 | - | - | - | 4.55  | - | 1.93  |
| P119 | - | - | - | 5.135 | - | 2.4   |
| P120 | - | - | - | 5.72  | - | 3.725 |
| P121 | - | - | - | 4.185 | - | 1.475 |
| P122 | - | - | - | 4.355 | - | 3.015 |
| P123 | - | - | - | 4.85  | - | 2.095 |
| P124 | - | - | - | 5.325 | - | 3.525 |
| P125 | - | - | - | 6.17  | - | 3.455 |
| P126 | - | - | - | 5.75  | - | 3.26  |
| P127 | - | - | - | 4.77  | - | 2.415 |
| P128 | - | - | - | 5.68  | - | 3.535 |
| P129 | - | - | - | 4.825 | - | 2.555 |
| P130 | - | - | - | 5.235 | - | 2.785 |
| P131 | - | - | - | 5.685 | - | 3.08  |
| P132 | - | - | - | 4.93  | - | 2.485 |
| P133 | - | - | - | 5.365 | - | 2.85  |
| P134 | - | - | - | 5.455 | - | 3.1   |
| P135 | - | - | - | 5.575 | - | 2.895 |
| P136 | - | - | - | 6.05  | - | 3.87  |
| P137 | - | - | - | 3.915 | - | 2.58  |
| P138 | - | - | - | 4.59  | - | 2.14  |
| P139 | - | - | - | 4.95  | - | 2.415 |
| P140 | - | - | - | 3.86  | - | 1.495 |
| P141 | - | - | - | 4.46  | - | 2.305 |
| P142 | - | - | - | 5.455 | - | 3.005 |
| P143 | - | - | - | 5.105 | - | 2.97  |
| P144 | - | - | - | 6.915 | - | 3.99  |
| P145 | - | - | - | 5.415 | - | 4.275 |
| P146 | - | - | - | 4.085 | - | 2.035 |
| P147 | - | - | - | 3     | - | 1.215 |
| P148 | - | - | - | 5.535 | - | 3.81  |
| P149 | - | - | - | 6.23  | - | 4.24  |
| P150 | - | - | - | 4.62  | - | 2.575 |
| P151 | - | - | - | 4.755 | - | 2.345 |
| P152 | - | - | - | 3.765 | - | 2     |
| P153 | - | - | - | 4.69  | - | 4.495 |
| P154 | - | - | - | 3.48  | - | 1.71  |
| P155 | - | - | - | 3.375 | - | 3.23  |
| P156 | - | - | - | 4.18  | - | 4.15  |
| P157 | - | - | - | 3.895 | - | 4.16  |
| P158 | - | - | - | 3.325 | - | 2.635 |
| P159 | - | - | - | 4.69  | - | 2.35  |
| P160 | - | - | - | 4.36  | - | 3.99  |
| P161 | - | - | - | 3.65  | - | 3.855 |
| P162 | - | - | - | 3.96  | - | 4.34  |
| P163 | - | - | - | 3.945 | - | 4.025 |
| P164 | - | - | - | 3.795 | - | 3.51  |
| P165 | - | - | - | 4.49  | - | 5.065 |
| P166 | - | - | - | 3.145 | - | 4.16  |

|      |   |   |   |       |   |       |
|------|---|---|---|-------|---|-------|
| P167 | - | - | - | 4.5   | - | 3.77  |
| P168 | - | - | - | 4.515 | - | 4.215 |
| P169 | - | - | - | 4.48  | - | 4.085 |
| P170 | - | - | - | 1.415 | - | 1.26  |
| P171 | - | - | - | 3.71  | - | 2.965 |
| P172 | - | - | - | 3.685 | - | 3.085 |
| P173 | - | - | - | 3.87  | - | 3.375 |
| P174 | - | - | - | 3.81  | - | 3.37  |
| P175 | - | - | - | 4.09  | - | 4.325 |
| P176 | - | - | - | 3.715 | - | 4.18  |
| P177 | - | - | - | 4.565 | - | 2.715 |
| P178 | - | - | - | 3.82  | - | 2.465 |
| P179 | - | - | - | 4.93  | - | 1.635 |
| P180 | - | - | - | 2.745 | - | 2.585 |
| P181 | - | - | - | 3.81  | - | 2.205 |
| P182 | - | - | - | 3.205 | - | 3.45  |
| P183 | - | - | - | 2.965 | - | 3.735 |
| P184 | - | - | - | 4.3   | - | 2.61  |
| P185 | - | - | - | 5.035 | - | 3.56  |
| P186 | - | - | - | 2.84  | - | 3.055 |
| P187 | - | - | - | 4.005 | - | 2.415 |
| P188 | - | - | - | 4.665 | - | 3.905 |
| P189 | - | - | - | 4.655 | - | 3.18  |
| P190 | - | - | - | 4.17  | - | 3.43  |
| P191 | - | - | - | 4.39  | - | 3.98  |
| P192 | - | - | - | 1.665 | - | 2.41  |
| P193 | - | - | - | 4.705 | - | 3.905 |
| P194 | - | - | - | 3.29  | - | 1.325 |
| P195 | - | - | - | 3.07  | - | 2.41  |
| P196 | - | - | - | 4.515 | - | 2.92  |
| P197 | - | - | - | 4.94  | - | 3.215 |
| P198 | - | - | - | 3.73  | - | 2.445 |
| P199 | - | - | - | 3.785 | - | 2.66  |
| P200 | - | - | - | 4.12  | - | 3.315 |
| P201 | - | - | - | 4.28  | - | 2.255 |
| P202 | - | - | - | 4.265 | - | 1.985 |
| P203 | - | - | - | 2.275 | - | 1.72  |
| P204 | - | - | - | 3.91  | - | 2.23  |
| P205 | - | - | - | 3.93  | - | 2.825 |
| P206 | - | - | - | 3.765 | - | 3.105 |
| P207 | - | - | - | 3.565 | - | 3.155 |
| P208 | - | - | - | 4.32  | - | 3.425 |
| P209 | - | - | - | 2.01  | - | 3.46  |
| P210 | - | - | - | 3.4   | - | 2.39  |
| P211 | - | - | - | 3.845 | - | 3.515 |
| P212 | - | - | - | 4.555 | - | 3.365 |
| P213 | - | - | - | 3.755 | - | 2.615 |
| P214 | - | - | - | 3.84  | - | 2.985 |
| P215 | - | - | - | 3.84  | - | 2.825 |
| P216 | - | - | - | 3.8   | - | 2.05  |
| P217 | - | - | - | 4.58  | - | 3.11  |
| P218 | - | - | - | 3.66  | - | 2.535 |
| P219 | - | - | - | 3.78  | - | 2.755 |
| P220 | - | - | - | 4.53  | - | 3.42  |
| P221 | - | - | - | 4.33  | - | 2.23  |
| P222 | - | - | - | 4.625 | - | 3.615 |
| P223 | - | - | - | 3.835 | - | 2.91  |
| P224 | - | - | - | 3.525 | - | 2.255 |
| P225 | - | - | - | 4.8   | - | 3.48  |

|      |        |       |      |       |       |       |
|------|--------|-------|------|-------|-------|-------|
| P226 | -      | -     | -    | 5.515 | -     | 4.58  |
| P227 | -      | -     | -    | 4.99  | -     | 3.01  |
| P228 | -      | -     | -    | 2.26  | -     | 0.93  |
| P229 | -      | -     | -    | 3.14  | -     | 2.395 |
| P230 | -      | -     | -    | 3.695 | -     | 2.78  |
| P231 | -      | -     | -    | 3.555 | -     | 2.415 |
| P232 | -      | -     | -    | 4.8   | -     | 3.785 |
| P233 | -      | -     | -    | 4.14  | -     | 1.765 |
| P234 | -      | -     | -    | 2.745 | -     | 1.095 |
| P235 | -      | -     | -    | 2.61  | -     | 2.205 |
| P236 | -      | -     | -    | 1.52  | -     | 1.295 |
| P237 | -      | -     | -    | 4.31  | -     | 3.555 |
| P238 | -      | -     | -    | 3.07  | -     | 4.185 |
| P239 | -      | -     | -    | 2.315 | -     | 3.16  |
| P240 | -      | -     | -    | 0.855 | -     | 2.04  |
| P241 | -      | -     | -    | 2.885 | -     | 3.255 |
| P242 | -      | -     | -    | 4.17  | -     | 5.69  |
| P243 | -      | -     | -    | 3.2   | -     | 3.99  |
| P244 | -      | -     | -    | 4.855 | -     | 4.505 |
| P245 | -      | -     | -    | 2.85  | -     | 2.355 |
| P246 | -      | -     | -    | 4.11  | -     | 4.065 |
| P247 | -      | -     | -    | 3.04  | -     | 5.27  |
| P248 | -      | -     | -    | 4.86  | -     | 5.12  |
| P249 | -      | -     | -    | 4.815 | -     | 5.17  |
| P250 | -      | -     | -    | 4.895 | -     | 4.355 |
| P251 | -      | -     | -    | 3.17  | -     | 3.71  |
| P252 | -      | -     | -    | 2.83  | -     | 3.355 |
| P253 | -      | -     | -    | 3.125 | -     | 2.875 |
| P254 | -      | -     | -    | 4.9   | -     | 4.38  |
| P255 | -      | -     | -    | 2.58  | -     | 1.285 |
| P256 | -      | -     | -    | 4.07  | -     | 4.575 |
| P257 | -      | -     | -    | 2.38  | -     | 3.735 |
| P258 | -      | -     | -    | 1.355 | -     | 2.49  |
| P259 | -      | -     | -    | 4.315 | -     | 3.465 |
| P260 | -      | -     | -    | 3.69  | -     | 3.38  |
| P261 | -      | -     | -    | 3.485 | -     | 3.595 |
| P262 | -      | -     | -    | 3.67  | -     | 3.81  |
| P263 | -      | -     | -    | 2.41  | -     | 3.92  |
| P264 | -      | -     | -    | 3.69  | -     | 4.345 |
| P265 | -      | -     | -    | 4.005 | -     | 3.95  |
| P266 | -      | -     | -    | 3.71  | -     | 3.98  |
| P267 | -      | -     | -    | 4.22  | -     | 4.51  |
| P268 | -      | -     | -    | 3.45  | -     | 3.62  |
| P269 | -      | -     | -    | 3.63  | -     | 3.315 |
| P270 | -      | -     | -    | 3.32  | -     | 2.575 |
| P271 | -      | -     | -    | 3.74  | -     | 3.91  |
| P272 | -      | -     | -    | 0.79  | -     | 1.375 |
| P273 | -      | -     | -    | 2.825 | -     | 2.38  |
| P274 | -      | -     | -    | 2.3   | -     | 1.82  |
| P275 | -      | -     | -    | 1.295 | -     | 0.85  |
| P276 | -      | -     | -    | 1.98  | -     | 1.5   |
| H001 | -1.44  | 7.625 | 1.9  | 1.96  | 2.495 | 2.52  |
| H002 | -1.275 | 6.31  | 2.03 | 2.49  | 2.38  | 2.745 |
| H003 | -1.39  | 6.33  | 3.77 | 1.57  | 2.68  | 2.145 |
| H004 | -1.455 | 4.95  | 2.98 | 2.325 | 3.095 | 3.16  |
| H005 | -2.755 | 3.79  | 2.67 | 1.83  | 2.52  | 2.62  |
| H006 | -2.74  | 5.59  | 4.09 | 2.025 | 3.145 | 2.845 |
| H007 | -2.905 | 5.01  | 5.04 | 3.315 | 2.185 | 3.99  |
| H008 | -2.57  | 5.22  | 3.66 | 2.875 | 1.55  | 3.525 |

|      |        |       |      |       |       |       |
|------|--------|-------|------|-------|-------|-------|
| H009 | -1.975 | 5.86  | 3.66 | 2.14  | 3.58  | 3.105 |
| H010 | -3.905 | 4.075 | 3.97 | 2.585 | 2.56  | 3.53  |
| H011 | 0.905  | 6.755 | 2.8  | 1.75  | 2.645 | 2.325 |
| H012 | 2.025  | 5.655 | 4.64 | 2.86  | 3.155 | 3.755 |
| H013 | 2.08   | 5.835 | 4.42 | 1.495 | 2.24  | 0.31  |
| H014 | 1.445  | 4.205 | 3.61 | 0.935 | 2.525 | 2.165 |
| H015 | 1.86   | 9.35  | 4.93 | 2.095 | 2.88  | 2.865 |
| H016 | 1.94   | 3.905 | 4.28 | 1.11  | 2.515 | 2.555 |
| H017 | 1.76   | 5.76  | 4.46 | 1.63  | 2.24  | 2.74  |
| H018 | 2.245  | 6.39  | 1.56 | 2.065 | 2.825 | 2.905 |
| H019 | 1.48   | 7.165 | 3.39 | 2.59  | 3.185 | 4.35  |
| H020 | 1.975  | 4.695 | 3.82 | 3.54  | 2.775 | 1.495 |
| H021 | 0.41   | 5.865 | 4.42 | 5.845 | 3.57  | 6.55  |
| H022 | 0.885  | 2.59  | 2.73 | 3.57  | 3.475 | 5.875 |
| H023 | 2.08   | 6.615 | 2.09 | 2.25  | 3.37  | 3.965 |
| H024 | 1.905  | 6.655 | 3.96 | 2.43  | 3.115 | 4.13  |
| H025 | 1.785  | 3.615 | 3.47 | 0.77  | 2.495 | 2.86  |
| H026 | 1.45   | 3.405 | 2.67 | 1     | 2.38  | 3.1   |
| H027 | 1.745  | 5.42  | 1.55 | 0.845 | 2.68  | 2.92  |
| H028 | 1.94   | 1.875 | 1.95 | 0.905 | 3.095 | 2.905 |
| H029 | 2.035  | 4.14  | 2.4  | -2.66 | 2.52  | -0.34 |
| H030 | 2.385  | 3.76  | 3.39 | 0.25  | 3.145 | 2.325 |
| H031 | 2.715  | 3.585 | 3.29 | 1.285 | 2.185 | 3.915 |
| H032 | 2.375  | 3.655 | 3.6  | 1.58  | 1.55  | 3.545 |
| H033 | 2.49   | 5.085 | 3.3  | 0.93  | 3.58  | 3.31  |
| H034 | 2.17   | 3.765 | 1.97 | -1.73 | 2.56  | 0.545 |
| H035 | 2.445  | 4.49  | 4.04 | 0.99  | 2.645 | 3     |
| H036 | 2.92   | 2.935 | 5.09 | 0.435 | 3.155 | 2.64  |
| H037 | 2.41   | 3.515 | 3.23 | 2.155 | 3.79  | 1.45  |
| H038 | 2.355  | 2.285 | 3.83 | 5.025 | 5.59  | 4.145 |
| H039 | 2.96   | 2.625 | 3.14 | 3.465 | 5.01  | 1.695 |
| H040 | 2.705  | 4.775 | 2.15 | 3.39  | 5.22  | 2.875 |
| H041 | 2.275  | 4.985 | 3.62 | 3.935 | 2.59  | 3.34  |
| H042 | 2.13   | 3.37  | 3.16 | 3     | 6.615 | 2.385 |
| H043 | 0.83   | 3.155 | 3.74 | 2.855 | 4.59  | 2.465 |
| H044 | 2.52   | 6.31  | 5.89 | 3.35  | 7.625 | 2.805 |
| H045 | 3.4    | 6.33  | 5.14 | 3.3   | 2.87  | 2.56  |
| H046 | 2.64   | 4.95  | 4.85 | 3.85  | 4.615 | 3.44  |
| H047 | 2.43   | 4.695 | 5.7  | 3.095 | 4.24  | 2.39  |
| H048 | 2.75   | 5.865 | 5.24 | 1.87  | 2.215 | 3.215 |
| H049 | -      | -     | -    | 3.4   | -     | 2.825 |
| H050 | -      | -     | -    | 3.75  | -     | 3.505 |
| H051 | -      | -     | -    | 4.11  | -     | 2.935 |
| H052 | -      | -     | -    | 3.37  | -     | 3.03  |
| H053 | -      | -     | -    | 3.05  | -     | 2.135 |
| H054 | -      | -     | -    | 3.955 | -     | 3.905 |
| H055 | -      | -     | -    | 2.49  | -     | 3.685 |
| H056 | -      | -     | -    | 2.13  | -     | 3.245 |
| H057 | -      | -     | -    | 2.635 | -     | 2.525 |
| H058 | -      | -     | -    | 3.54  | -     | 2.93  |
| H059 | -      | -     | -    | 3.99  | -     | 1.77  |
| H060 | -      | -     | -    | 3.6   | -     | 2.115 |
| H061 | -      | -     | -    | 4.325 | -     | 2.73  |
| H062 | -      | -     | -    | 3.61  | -     | 2.12  |
| H063 | -      | -     | -    | 2.86  | -     | 1.95  |
| H064 | -      | -     | -    | 4.255 | -     | 2.725 |
| H065 | -      | -     | -    | 3.755 | -     | 2.41  |
| H066 | -      | -     | -    | 3.33  | -     | 1.695 |
| H067 | -      | -     | -    | 5.515 | -     | 3.47  |

|      |   |   |   |       |   |        |
|------|---|---|---|-------|---|--------|
| H068 | - | - | - | 4.11  | - | 2.02   |
| H069 | - | - | - | 3.87  | - | 2.735  |
| H070 | - | - | - | 4.45  | - | 3.415  |
| H071 | - | - | - | 4.045 | - | 1.895  |
| H072 | - | - | - | 4.915 | - | 2.9    |
| H073 | - | - | - | 4.11  | - | 2.15   |
| H074 | - | - | - | 4.425 | - | 2.735  |
| H075 | - | - | - | 4.315 | - | 3.14   |
| H076 | - | - | - | 4.205 | - | 2.475  |
| H077 | - | - | - | 2.32  | - | 2.84   |
| H078 | - | - | - | 5.085 | - | 2.55   |
| H079 | - | - | - | 4.15  | - | 2.24   |
| H080 | - | - | - | 2.99  | - | 3.055  |
| H081 | - | - | - | 2.64  | - | 3.06   |
| H082 | - | - | - | 4.05  | - | 2.87   |
| H083 | - | - | - | 4.07  | - | 1.485  |
| H084 | - | - | - | 3.78  | - | 1.075  |
| H085 | - | - | - | 4.655 | - | 2.095  |
| H086 | - | - | - | 3.95  | - | 3.19   |
| H087 | - | - | - | 2.86  | - | 3.735  |
| H088 | - | - | - | 4.5   | - | 1.96   |
| H089 | - | - | - | 4.335 | - | 2.18   |
| H090 | - | - | - | 2.085 | - | 2.365  |
| H091 | - | - | - | 3.825 | - | 2.76   |
| H092 | - | - | - | -0.22 | - | 1.83   |
| H093 | - | - | - | 2.47  | - | 1.995  |
| H094 | - | - | - | 2.475 | - | 1.865  |
| H095 | - | - | - | 2.205 | - | 1.115  |
| H096 | - | - | - | -0.03 | - | 0.39   |
| H097 | - | - | - | 2.725 | - | 1.12   |
| H098 | - | - | - | 1.625 | - | 0.595  |
| H099 | - | - | - | 0.06  | - | 1.03   |
| H100 | - | - | - | 1.67  | - | 4.82   |
| H101 | - | - | - | 1.51  | - | 0.94   |
| H102 | - | - | - | 2.13  | - | 0.07   |
| H103 | - | - | - | 0.77  | - | -2.855 |
| H104 | - | - | - | 2.5   | - | 0.045  |
| H105 | - | - | - | 1.86  | - | -0.085 |
| H106 | - | - | - | 0.505 | - | 0.26   |
| H107 | - | - | - | 2.13  | - | -0.375 |
| H108 | - | - | - | 1.25  | - | 1.54   |
| H109 | - | - | - | 1.98  | - | -0.12  |
| H110 | - | - | - | 0     | - | -2     |
| H111 | - | - | - | 1.675 | - | -0.065 |
| H112 | - | - | - | 2.985 | - | -0.77  |
| H113 | - | - | - | 0.98  | - | 0.19   |
| H114 | - | - | - | 2.195 | - | 0.23   |
| H115 | - | - | - | 2.62  | - | -0.2   |
| H116 | - | - | - | 2.475 | - | 0.615  |
| H117 | - | - | - | 2.565 | - | -1.95  |
| H118 | - | - | - | 4.065 | - | 1.295  |
| H119 | - | - | - | 4.52  | - | 1.01   |
| H120 | - | - | - | 4.605 | - | 0.44   |
| H121 | - | - | - | 2.43  | - | 1.17   |
| H122 | - | - | - | 2.805 | - | 0.82   |
| H123 | - | - | - | 5.365 | - | 0.9    |
| H124 | - | - | - | 2.875 | - | 1.76   |
| H125 | - | - | - | 4.875 | - | 1.825  |
| H126 | - | - | - | 4.455 | - | 2.67   |

|      |   |   |   |        |   |        |
|------|---|---|---|--------|---|--------|
| H127 | - | - | - | 3.455  | - | 1.605  |
| H128 | - | - | - | 5.06   | - | 2.515  |
| H129 | - | - | - | 3.98   | - | 0.91   |
| H130 | - | - | - | 4.465  | - | 0.47   |
| H131 | - | - | - | 4.215  | - | 1.94   |
| H132 | - | - | - | 4.01   | - | 2.08   |
| H133 | - | - | - | 2.61   | - | 1.835  |
| H134 | - | - | - | 4.28   | - | 1.355  |
| H135 | - | - | - | 2.905  | - | 2.09   |
| H136 | - | - | - | 3.62   | - | 0.6    |
| H137 | - | - | - | 2.51   | - | 1.505  |
| H138 | - | - | - | 2.875  | - | -1.37  |
| H139 | - | - | - | 2.94   | - | 0.945  |
| H140 | - | - | - | 2.855  | - | 1.49   |
| H141 | - | - | - | 1.82   | - | 2.635  |
| H142 | - | - | - | 2.6    | - | 2.755  |
| H143 | - | - | - | 0.38   | - | 3.845  |
| H144 | - | - | - | 3.145  | - | 3.415  |
| H145 | - | - | - | 2.54   | - | 0.55   |
| H146 | - | - | - | 1.92   | - | 4.01   |
| H147 | - | - | - | 2.555  | - | 3.26   |
| H148 | - | - | - | 2.27   | - | 2.175  |
| H149 | - | - | - | 1.32   | - | 5.25   |
| H150 | - | - | - | 3.79   | - | 4.63   |
| H151 | - | - | - | 3.075  | - | 3.26   |
| H152 | - | - | - | 2.725  | - | 3.055  |
| H153 | - | - | - | 0.085  | - | 1.73   |
| H154 | - | - | - | 1.035  | - | 2.76   |
| H155 | - | - | - | -0.785 | - | 2.19   |
| H156 | - | - | - | 2.53   | - | 2.815  |
| H157 | - | - | - | -1.375 | - | 2.455  |
| H158 | - | - | - | -1.045 | - | 2.04   |
| H159 | - | - | - | -2.5   | - | 1.09   |
| H160 | - | - | - | -1.32  | - | 2.79   |
| H161 | - | - | - | 0.56   | - | 1.24   |
| H162 | - | - | - | 1.28   | - | 2.215  |
| H163 | - | - | - | 0.055  | - | 1.915  |
| H164 | - | - | - | 1.26   | - | 1.165  |
| H165 | - | - | - | 0.45   | - | 2.725  |
| H166 | - | - | - | 0.585  | - | 2.585  |
| H167 | - | - | - | -1.245 | - | 2.235  |
| H168 | - | - | - | 0.08   | - | 1.825  |
| H169 | - | - | - | -1.13  | - | 1.84   |
| H170 | - | - | - | -0.475 | - | 0.99   |
| H171 | - | - | - | -0.555 | - | 2.31   |
| H172 | - | - | - | -1.465 | - | 2.01   |
| H173 | - | - | - | 0.72   | - | 1.465  |
| H174 | - | - | - | 2.915  | - | 1.36   |
| H175 | - | - | - | 2.655  | - | 1.88   |
| H176 | - | - | - | 2.335  | - | 0.93   |
| H177 | - | - | - | 2.575  | - | 1.935  |
| H178 | - | - | - | 3.28   | - | 1.71   |
| H179 | - | - | - | 2.35   | - | -2.75  |
| H180 | - | - | - | 3.465  | - | -3.385 |
| H181 | - | - | - | 0.12   | - | -1.67  |
| H182 | - | - | - | 1.565  | - | 3.25   |
| H183 | - | - | - | 0.62   | - | -3.05  |
| H184 | - | - | - | 0.055  | - | -2.715 |
| H185 | - | - | - | 2.655  | - | -2.385 |



|      |   |   |   |        |   |        |
|------|---|---|---|--------|---|--------|
| H186 | - | - | - | 3.795  | - | -0.695 |
| H187 | - | - | - | 3.215  | - | -1.195 |
| H188 | - | - | - | 0.41   | - | -3.22  |
| H189 | - | - | - | 2.98   | - | -1.91  |
| H190 | - | - | - | 3.995  | - | -1.68  |
| H191 | - | - | - | 2.365  | - | -2.22  |
| H192 | - | - | - | 3.14   | - | -3.39  |
| H193 | - | - | - | 3.4    | - | -2.52  |
| H194 | - | - | - | 3.57   | - | -1.805 |
| H195 | - | - | - | 3.86   | - | -4.665 |
| H196 | - | - | - | 2.99   | - | -3.34  |
| H197 | - | - | - | 2.535  | - | -3.075 |
| H198 | - | - | - | 2.875  | - | -4.28  |
| H199 | - | - | - | 3.015  | - | 3.295  |
| H200 | - | - | - | 1.18   | - | 2.37   |
| H201 | - | - | - | 3.325  | - | 4.63   |
| H202 | - | - | - | 1.805  | - | 4.16   |
| H203 | - | - | - | 2.16   | - | 4.185  |
| H204 | - | - | - | 2.645  | - | 4.015  |
| H205 | - | - | - | 3.755  | - | 3.725  |
| H206 | - | - | - | 0.79   | - | 1.32   |
| H207 | - | - | - | 3.01   | - | 4.185  |
| H208 | - | - | - | 4.09   | - | 4.38   |
| H209 | - | - | - | 3.375  | - | 3.12   |
| H210 | - | - | - | 1.81   | - | 4.025  |
| H211 | - | - | - | 3.06   | - | 1.905  |
| H212 | - | - | - | 2.72   | - | 2.515  |
| H213 | - | - | - | 3.215  | - | 2.36   |
| H214 | - | - | - | 2.39   | - | 3.25   |
| H215 | - | - | - | 3.995  | - | 2.615  |
| H216 | - | - | - | 2.79   | - | 4.165  |
| H217 | - | - | - | 1.805  | - | 4.1    |
| H218 | - | - | - | 4.65   | - | 4.425  |
| H219 | - | - | - | 3.95   | - | 0.035  |
| H220 | - | - | - | 3.655  | - | 2.21   |
| H221 | - | - | - | 3.825  | - | 2.005  |
| H222 | - | - | - | 2.69   | - | 2.03   |
| H223 | - | - | - | 4.075  | - | 1.88   |
| H224 | - | - | - | 2.99   | - | 3.55   |
| H225 | - | - | - | 3.28   | - | 2.145  |
| H226 | - | - | - | 1.68   | - | 3.065  |
| H227 | - | - | - | 2.935  | - | 1.185  |
| H228 | - | - | - | 4.18   | - | 1.805  |
| H229 | - | - | - | 3.34   | - | 0.105  |
| H230 | - | - | - | 3.73   | - | 0.955  |
| H231 | - | - | - | 2.925  | - | 3.155  |
| H232 | - | - | - | 0.625  | - | 3.81   |
| H233 | - | - | - | 1.465  | - | 0.99   |
| H234 | - | - | - | 1.215  | - | 1.55   |
| H235 | - | - | - | 0.675  | - | 3.05   |
| H236 | - | - | - | -0.335 | - | 4.13   |
| H237 | - | - | - | 1.525  | - | 2.14   |
| H238 | - | - | - | 1.09   | - | 2.925  |
| H239 | - | - | - | 2.225  | - | 3.95   |
| H240 | - | - | - | 2.41   | - | 3.075  |
| H241 | - | - | - | 0.595  | - | 4.03   |
| H242 | - | - | - | 1.99   | - | 3.7    |
| H243 | - | - | - | 1.4    | - | 2.635  |
| H244 | - | - | - | 1.835  | - | 2.375  |

|      |   |   |   |        |   |        |
|------|---|---|---|--------|---|--------|
| H245 | - | - | - | 1.295  | - | 3.635  |
| H246 | - | - | - | 1.58   | - | -1.195 |
| H247 | - | - | - | 1.715  | - | 3.3    |
| H248 | - | - | - | 0.2    | - | 3.125  |
| H249 | - | - | - | 0.83   | - | 3.175  |
| H250 | - | - | - | 1.76   | - | 3.04   |
| H251 | - | - | - | 0.62   | - | 4.73   |
| H252 | - | - | - | 2.025  | - | -1.225 |
| H253 | - | - | - | 0.38   | - | 3.315  |
| H254 | - | - | - | 3.145  | - | 4.36   |
| H255 | - | - | - | 2.54   | - | 3.605  |
| H256 | - | - | - | 1.92   | - | 3.595  |
| H257 | - | - | - | 2.555  | - | 3.63   |
| H258 | - | - | - | 2.27   | - | 2.8    |
| H259 | - | - | - | 1.32   | - | 3.16   |
| H260 | - | - | - | 3.79   | - | 1.975  |
| H261 | - | - | - | 3.075  | - | 3.425  |
| H262 | - | - | - | 2.725  | - | 2.765  |
| H263 | - | - | - | 0.085  | - | 1.835  |
| H264 | - | - | - | 1.035  | - | 4.02   |
| H265 | - | - | - | -0.785 | - | 3.925  |
| H266 | - | - | - | 2.53   | - | 3.005  |
| H267 | - | - | - | -1.375 | - | 3.8    |
| H268 | - | - | - | -1.045 | - | 2.675  |
| H269 | - | - | - | -2.5   | - | 4.06   |
| H270 | - | - | - | -1.32  | - | 2.885  |
| H271 | - | - | - | 0.56   | - | 3.215  |
| H272 | - | - | - | 1.28   | - | 1.93   |
| H273 | - | - | - | 0.055  | - | 3.22   |
| H274 | - | - | - | 1.26   | - | 4.365  |
| H275 | - | - | - | 0.45   | - | 2.965  |
| H276 | - | - | - | 0.585  | - | 3.24   |
| H277 | - | - | - | -1.245 | - | 2.775  |
| H278 | - | - | - | 0.08   | - | 0.46   |
| H279 | - | - | - | -1.13  | - | 0.575  |
| H280 | - | - | - | -0.475 | - | 0.17   |
| H281 | - | - | - | -0.555 | - | 0.275  |
| H282 | - | - | - | -1.465 | - | -2.87  |
